41 **Abstract**

42  
43 Anxiety disorders are prevalent across the United States and result in a large personal and  
44 societal burden. Currently, numerous therapeutic and pharmaceutical treatment options exist.  
45 However, drugs to classical receptor targets have shown limited efficacy and often come with  
46 unpleasant side effects, highlighting the need to identify novel targets involved in the etiology  
47 and treatment of anxiety disorders. GPR83, a recently orphanized receptor activated by the  
48 abundant neuropeptide PEN, has also been identified as a glucocorticoid regulated receptor (and  
49 named GIR) suggesting that this receptor may be involved in stress-responses that underlie  
50 anxiety. Consistent with this, GPR83 null mice have been found to be resistant to stress-induced  
51 anxiety. However, studies examining the role of GPR83 within specific brain regions or potential  
52 sex differences have been lacking. In this study, we investigate anxiety-related behaviors in male  
53 and female mice with global knockout and following local GPR83 knockdown in female mice.  
54 We find that a global knockdown of GPR83 has minimal impact on anxiety-like behaviors in  
55 female mice and a decrease in anxiety-related behaviors in male mice. In contrast, a local GPR83  
56 knockdown in the basolateral amygdala leads to more anxiety-related behaviors in female mice.  
57 Local GPR83 knockdown in the central amygdala or nucleus accumbens showed no significant  
58 effect on anxiety-related behaviors. Finally, dexamethasone administration leads to a significant  
59 decrease in receptor expression in the amygdala and nucleus accumbens of female mice.  
60 Together, our studies uncover a significant, but divergent role for GPR83 in different brain  
61 regions in the regulation of anxiety-related behaviors, which is furthermore dependent on sex.

62  
63  
64  
65  
66  
67  
68  
69  
70  
71  
72  
73  
74  
75  
76  
77  
78  
79  
80

## 81 Introduction

82  
83 Anxiety disorders manifest in a variety of symptoms, but often involve excessive and/or  
84 persistent worry and fear that is considered maladaptive and intensifies over time. These  
85 disorders occur in approximately 20% of the population, and therefore represent a significant  
86 societal and economic burden. Anxiety disorders also occur at a higher rate in females compared  
87 to males (Palanza, 2001; Boivin et al., 2017; Zuloaga et al., 2020) (see also [www.nih.nimh.gov](http://www.nih.nimh.gov)),  
88 and females respond differentially to anxiolytic drugs (Palanza, 2001) suggesting differences in  
89 the etiologies and/or underlying circuitry for anxiety between males and females. There are  
90 several neurotransmitter systems such as the  $\gamma$ -aminobutyric acid (GABA)-ergic and serotonergic  
91 systems, as well as neuropeptide systems including neuropeptide Y, cholecystokinin,  
92 corticotrophin releasing factor, and substance P that are targets for anxiety disorders (Griebel and  
93 Holmes, 2013; Murrrough et al., 2015). Despite decades of continued research into the treatment  
94 of anxiety by targeting these major neurotransmitter systems, little progress has been made in the  
95 development of more efficacious treatments. This has led to a shift in research focus to other  
96 lesser known neurotransmitter and peptide systems with the intent of identifying the next  
97 generation of anxiolytics. One underutilized source of novel therapeutics is the pool of orphan G  
98 protein-coupled receptors (GPCRs) whose endogenous ligands are beginning to be explored.  
99

100 Studies focussing on deorphanizing hypothalamic orphan GPCRs led to the identification  
101 of the abundant neuropeptide PEN as an endogenous ligand for the orphan receptor GPR83  
102 (Gomes et al., 2016; Foster et al., 2019; Parobchak et al., 2020). The PEN peptide is a product of  
103 the cleavage of the proSAAS precursor (Fricker et al., 2000; Mzhavia et al., 2002), and has been  
104 implicated in a number of neurologic functions and disorders including feeding, reward, and  
105 Alzheimer's disease (Wei et al., 2004; Wardman et al., 2011; Hoshino et al., 2014; Wang et al.,  
106 2016a; Berezniuk et al., 2017). In fact, proSAAS and its peptide products have also been  
107 implicated in anxiety-related behavior (Wei et al., 2004; Morgan et al., 2010; Bobeck et al.,  
108 2017). Specifically for GPR83, it was found that the glucocorticoid receptor agonist,  
109 dexamethasone, regulates its expression in immune cells and the brain (Harrigan et al., 1989,  
110 1991; Adams et al., 2003) suggesting that activation of stress-responses regulates GPR83  
111 expression. Finally, a study examining behaviors of mice lacking GPR83 noted that they were  
112 resilient to stress-induced anxiety (Vollmer et al., 2013). These data have suggested a role for  
113 GPR83 in modulating anxiety-related behaviors (Lueptow et al., 2018; Mack et al., 2019).

114 In this study, we sought to directly investigate the role of GPR83 in anxiety-related  
115 behaviors, with a specific focus on female mice who have been previously overlooked, and  
116 furthermore, to determine the extent to which GPR83 expression in the amygdala subnuclei and  
117 nucleus accumbens contribute to these behaviors. To date, no small molecule agonists or  
118 antagonists for this receptor have been identified, therefore we used a combination of GPR83  
119 global knockout (KO) animals and GPR83 shRNA mediated local knockdown (KD) in the  
120 basolateral amygdala (BLA), central nucleus of the amygdala (CeA) and nucleus accumbens

121 (NAc) to study the role of this receptor in anxiety-related behaviors. These brain regions play a  
122 role in anxiety, display significant GPR83 expression, and form circuits that encode positive and  
123 negative affective valence (Stuber et al., 2011; Tye et al., 2011; Janak and Tye, 2015a; Namburi  
124 et al., 2015; Tovote et al., 2015; Beyeler et al., 2016; Lueptow et al., 2018; Fakira et al., 2019).  
125 Our initial behavioral studies also included both male and female subjects to determine whether  
126 GPR83 plays a differential role in anxiety-related behaviors between the two sexes. We found  
127 that the knockdown of GPR83 in the basolateral amygdala of female mice resulted in increased  
128 anxiety-related behaviors and that dexamethasone administration led to sex-specific regulation of  
129 GPR83 expression supporting a role for this receptor in modulating anxiety-related behaviors  
130 which are dependent on sex.

131

## 132 **Materials and Methods**

133

### 134 **Animals**

135 GPR83/eGFP (Rockefeller University, NY, NY), GPR83 KO and C57BL/6J (Jackson Labs, Bar  
136 Harbor ME) male and female mice (8-12 weeks) were maintained on a 12hr light/dark cycle with  
137 water and food ad libitum. GPR83/eGFP BAC transgenic mice were generated by the GENSAT  
138 project at Rockefeller University. The coding sequence for enhanced green fluorescent protein  
139 (eGFP) followed by a polyadenylation signal was inserted into a bacterial artificial chromosome  
140 (BAC) at the ATG transcription codon of GPR83. Therefore, cells that express GPR83 mRNA  
141 also express eGFP. GPR83 knockout (Jackson Labs, Bar Harbor, ME) mice, generated  
142 previously (Lu et al., 2007), lack GPR83 protein and mRNA (Gomes et al., 2016; Fakira et al.,  
143 2019). Animal protocols were approved by the IACUC at Icahn School of Medicine at Mount  
144 Sinai, according to NIH's Guide for the Care and Use of Laboratory Animals. The number of  
145 animals of each sex per group for each experiment is indicated on the individual figure legends.

146

### 147 **Elevated Plus Maze and Open Field Assay**

148 One week prior to testing mice were handled for five minutes a day for three to four days. On the  
149 day of testing, mice were habituated to the testing room 1-hour before open field testing  
150 followed by the elevated plus maze four hours later. The open field consists of a 40 x 40 x 40  
151 cm box made of white plastic material. Mice explored the open field for 30 minutes under red  
152 light illumination. The amount of time spent in the center of the open field was tracked for the  
153 first 5 minutes and the distance traveled was tracked for 20 minutes. The elevated plus maze  
154 consisted of two open and two closed arms (12 x 50 cm each) on a pedestal 60 cm above the  
155 floor. Mice explored the maze for 5 min under red light. The amount of time spent in each arm  
156 was tracked and analyzed using Noldus EthoVision XT. Data are presented as center time (s),  
157 distance traveled (cm), and open arm time (%; open arm time/ (open arm + closed arm time)).  
158 Vaginal swabs from the female mice were collected and visualized immediately following  
159 behavioral testing as described previously (McLean et al., 2012). Images were collected from  
160 the vaginal smears from each animal. The images were later visualized by two blinded

161 investigators who categorized them as proestrus, estrous, metestrus and diestrus by the  
162 presence of nucleated epithelial cells, cornified epithelial cells and leukocytes. During  
163 metestrus and diestrus leukocytes predominate while, proestrus and estrus is characterized by  
164 nucleated and cornified epithelial cells. For analysis, female mice were grouped together as  
165 mice in estrus/proestrus, when follicle stimulating hormone, estradiol, luteinizing hormone,  
166 and prolactin levels are high. This group of mice are referred to as oestrus throughout the  
167 paper. The mice in diestrus and metestrus, when progesterone levels predominate, were also  
168 grouped together and are referred to as diestrus throughout the paper (Miller and Takahashi,  
169 2014).

170

### 171 **Immunofluorescence and Confocal Imaging**

172 GPR83/eGFP mice were perfused with 4% paraformaldehyde in phosphate buffered saline pH  
173 7.4. The brains were removed and post fixed in 4% paraformaldehyde in phosphate buffered  
174 saline overnight. Brains were rinsed 3 times in phosphate buffered saline and 50  $\mu$ M coronal  
175 brain slices were obtained using a vibratome (Leica VT1000, Buffalo Grove, Il), without  
176 embedding the tissue. To visually enhance eGFP expression, immunohistochemical analysis was  
177 carried out using chicken anti-GFP (1:1000) as the primary antibody (Aves Labs, Tigard, OR)  
178 and anti-chicken 488 (1:1000) as the secondary antibody (Molecular Probes, Eugene, OR). In  
179 addition, brain slices were co-stained for parvalbumin (1:250; ThermoFischer Scientific,  
180 Rockford, Il) overnight followed by anti-sheep 568 (1:500) secondary antibody. Confocal  
181 microscopy was performed in the Microscopy CoRE at the Icahn School of Medicine at Mount  
182 Sinai. Confocal z-stack images were taken on a Zeiss LSM 780 microscope and processed using  
183 Zeiss software. Confocal images of the amygdala were taken from regions from coronal sections  
184 between Bregma -0.58 and -2.06 mm (Paxinos and Franklin, 2012).

185

### 186 **Dexamethasone Treatment and Quantitative PCR**

187 Male and female mice were injected with dexamethasone (5mg/kg; i.p.). Three hours later  
188 amygdala and NAc punches were collected for qPCR analysis. Total cellular RNA was extracted  
189 from amygdala and NAc punches using Qiazol reagent and the RNAeasy Midi kit (QIAGEN,  
190 Valencia, CA). Total RNA was reverse transcribed into cDNA using VILO master mix  
191 (Invitrogen, Carlsbad, CA). qPCR was performed in triplicate aliquots from each individual  
192 animal with Power SYBR Green PCR master mix (ThermoFisher, Waltham, MA), 25 ng of  
193 cDNA and 0.5  $\mu$ M of primers using an ABI Prism 7900HT (Thermo Fisher, Waltham, MA) in  
194 the qPCR CoRE at Icahn School of Medicine at Mount Sinai. Primer sequences for GPR83,  
195 proSAAS and GAPDH are the same as used previously (Fakira et al., 2019). The primer  
196 sequences used for qPCR are: GAPDH Forward: 5'-TGAAGGTCGGTGTGAACG Reverse: 5'-  
197 CAATCTCCACTTTGCCACTG, GPR83 Forward: 5'-GCAGTGAGATGCTTGGGTTC  
198 Reverse: 5'-CCCACCAATAGTATGGCTCA and proSAAS: Forward: 5'-  
199 AGTGTATGATGATGGCCC Reverse: 5'-CCCTAGCAAGTACCTCAG. The CT values for the  
200 technical replicates were averaged and analysis performed using the  $\Delta\Delta C_T$  method and

201 normalized to saline controls. In some cases, qPCR reactions were repeated to determine the  
202 reliability of the primers and RNA samples.

203

### 204 **GPR83 shRNA and surgeries**

205 Three weeks prior to behavioral testing, a craniotomy was performed under isoflurane anesthesia  
206 and 0.5  $\mu$ L of lentiviral GPR83 shRNA or control shRNA particles ( $10^9$ ; Sigma Mission  
207 Lentiviral Transduction Particles, St. Louis, MO) were infused into the NAc (A/P: +1.5, Lat: +/-  
208 1.6, D/V:-4.4), BLA (A/P: -1.1, Lat: +/- 3.2, D/V:-5.1) or CeA (A/P: -1.0, Lat: +/- 2.8, D/V:-4.9).  
209 The GPR83 shRNA targeted the sequence 5'-CCATGAGCAGTACTTGTTATA-3', an exonic  
210 region of the gene. A nucleotide BLAST of this sequence produces three alignments with E  
211 values of 0.003 that correspond to GPR83 variants; other alignments have E values greater than  
212 40, indicating that this sequence has few off targets.

213

### 214 **Data Analysis**

215 Data are presented as mean  $\pm$  SEM. Data were analyzed using Student's t-test or Two-way  
216 ANOVA with Bonferroni's Multiple Comparison post-hoc tests using GraphPad Prism 8.0  
217 software (San Diego, CA). The number of animals/group for each experiment is indicated on the  
218 individual figure legends.

219

### 220 **Results**

221 **Analysis of anxiety-related behaviors in male and female GPR83 KO mice.** Anxiety-related  
222 behaviors in GPR83 WT and KO mice were analyzed using the elevated plus maze (Figure 1A)  
223 and open field tests (Figure 1D). GPR83 KO mice spent more time in the open arms of the  
224 elevated plus maze (EPM) compared to wild type mice, indicating lower anxiety-like behavior in  
225 KO mice; however, there was no difference in the frequency to enter the open arms (Figure 1B  
226 and C). In the open field assay, there was no difference in the amount of time GPR83 KO mice  
227 spent in the center of the open field; however, there was a significant increase in the frequency  
228 that they entered the center region, also an indication of lower anxiety-like behavior (Figure 1E  
229 and F). Overall, these differences are unlikely to be due to changes in overall motor activity of  
230 GPR83 KO mice, since there were no differences in locomotor activity in the open field (Figure  
231 1G). Together, these results show that global loss of GPR83 produces a decrease in anxiety  
232 levels.

233 The data were further analyzed to determine the extent to which sex differences might  
234 contribute to anxiety-related behaviors in the global GPR83 KO mice. In the EPM test, when  
235 separated by sex, GPR83 KO mice exhibited a significant effect on open arm time, with no  
236 interactions between sex and GPR83 KO genotype (Figure 2B; 2-way ANOVA; Interaction  
237  $F_{(1,70)}=0.11$ ,  $p=0.7436$ ; GPR83 KO  $F_{(1,70)}=5.02$ ,  $p=0.0282$ ; Sex  $F_{(1,70)}=1.14$ ,  $p=0.2891$ ). In  
238 addition, Bonferroni's post-hoc analysis did not indicate any differences between groups;  
239 however, male GPR83 KO mice spent more time in the open arm of the elevated plus maze  
240 compared to wild type when analyzed by Student's T-test (Figure 2B;  $*p<0.05$ ). Neither analysis  
241 revealed any differences in the frequency to enter the open arm for either sex (Figure 2C, 2-way



242 ANOVA; Interaction  $F_{(1,70)}=0.57$ ,  $p=0.4525$ ; GPR83 genotype  $F_{(1,70)}=1.74$ ,  $p=0.1918$ ; Sex  
243  $F_{(1,70)}=0.98$ ,  $p=0.3258$ ). Direct comparison of open arm time in wild type males and females  
244 indicates that there is a tendency for female mice to spend more time in the open arm compared  
245 to males (Figure 2B; Student's t-test @  $p=0.0872$ ), indicating that female mice may be less  
246 anxious compared to males overall.

247 In the open field test the sex-dependent analysis of anxiety-related behavior revealed that  
248 male GPR83 KO mice spent significantly more time in the center compared to wild type males,  
249 an effect that was not seen when comparing female GPR83 KO mice with wild type females  
250 (Figure 2E; 2-way ANOVA; Interaction  $F_{(1,51)}=6.34$ ,  $p=0.0150$ ; GPR83 KO  $F_{(1,51)}=4.67$ ,  
251  $p=0.0355$ ; Sex  $F_{(1,51)}=0.15$ ,  $p=0.7044$ ; Bonferroni's post-hoc test Males: WT vs GPR83 KO,  
252  $*p<0.05$ ). Moreover, analysis of frequency to enter the center indicates a similar effect in that  
253 male GPR83 KO mice entered the center of the open field more frequently than male wild type  
254 mice while no differences were seen between female GPR83 KO mice and female wild type  
255 mice (Figure 2F; 2-way ANOVA; Interaction  $F_{(1,51)}=2.84$ ,  $p=0.0980$ ; GPR83  $F_{(1,51)}=7.01$ ,  
256  $p=0.0107$ ; Sex  $F_{(1,51)}=2.69$ ,  $p=0.1071$ ; Bonferroni's post-hoc test Males: WT vs GPR83 KO,  
257  $*p<0.05$ ). Analysis of baseline anxiety differences between wild type male and female mice  
258 indicate that female mice display significantly less anxiety-related behaviors levels, spending  
259 more time in the center ( $\#p<0.05$ ) and entering the center of the open field more frequently ( $\#\#$   
260  $p<0.01$ ) than males (Figure 2E and F). In addition, we find no effect of GPR83 KO on locomotor  
261 activity levels even when segregated by sex (Figure 2G; 2-way ANOVA; Interaction  
262  $F_{(1,54)}=0.001201$ ,  $p=0.9725$ ; GPR83  $F_{(1,54)}=1.137$ ,  $p=0.02911$ ; Sex  $F_{(1,54)}=1.341$ ,  $p=0.2520$ ).  
263 Overall, these data indicate that lack of GPR83 produces a decrease in anxiety-related behaviors  
264 that is more pronounced in male mice, likely due to their higher levels of baseline anxiety  
265 compared to female mice.

266  
267 **Cell-type specific expression of GPR83 expression in the amygdala.** The amygdala is a brain  
268 region well known to play a role in anxiety-related behaviors (Gilpin et al., 2015; Janak and Tye,  
269 2015b; Tovote et al., 2015). Within the basolateral amygdala (BLA), parvalbumin cells (PV<sup>+</sup>) are  
270 the largest population of GABAergic inhibitory interneurons (McDonald and Mascagni, 2001),  
271 directly influencing output of primary excitatory neurons, and these cells have been directly  
272 implicated in anxiety-like behavior (Urakawa et al., 2013; Babaev et al., 2018). In addition, PV<sup>+</sup>  
273 neurons within the central amygdala (CeA), have been implicated in anxiety trait (Ravenelle et  
274 al., 2014), as well as opioid withdrawal-induced negative affect, including anxiety-like behavior  
275 (Wang et al., 2016b). *In situ* hybridization data from the Allen Mouse Brain Atlas indicates that  
276 GPR83 is expressed in both the BLA and CeA (Figure 3A and B). Therefore, we sought to  
277 examine the co-expression of PV<sup>+</sup> and GPR83<sup>+</sup> cells in this brain region using GPR83/GFP BAC  
278 transgenic mice. These mice express eGFP under control of the GPR83 promoter; therefore all  
279 cells that express the receptor will also express eGFP. We find that GPR83 is expressed  
280 throughout the amygdala (Figure 3C) with higher expression in the BLA and the CeA (Fig 3C  
281 and D). Higher magnification images demonstrate that the eGFP positive cells have a neuronal

282 morphology (Fig 3E). Subsequent co-staining with parvalbumin indicates that some of the  
283 GPR83 positive cells express parvalbumin and, therefore are GABAergic neurons (Figure 3F-H).

284 The nucleus accumbens (NAc) is another brain region that contains a high concentration  
285 of GPR83 positive cells, and has been strongly implicated in vulnerability and resilience  
286 responses to stress (Zhu et al., 2017) as well as anxiety-like behaviors (Xiao et al., 2020). In  
287 contrast to the amygdala, we have recently reported that GPR83 is primarily expressed in  
288 cholinergic interneurons in the NAc (Fakira et al., 2019). However, a small percentage of  
289 neurons were not characterized but recent studies demonstrated that PV<sup>+</sup> neurons in the striatum  
290 indeed express GPR83 (Enterría-Morales et al., 2020). Because PV<sup>+</sup> neurons in the NAc have  
291 been specifically implicated in anxiety-like approach behaviors, we also characterized PV<sup>+</sup> and  
292 GPR83<sup>+</sup> co-expression in the NAc. We find that a small population of GPR83 positive cells in  
293 the NAc also express parvalbumin suggesting the presence of this receptor in some GABAergic  
294 neurons (Fig 3I-K).

295  
296 **Divergent regulation of GPR83 in male and female mice following acute dexamethasone**  
297 **administration.** Studies have shown that GPR83 expression is regulated by the glucocorticoid  
298 agonist dexamethasone (Harrigan et al., 1989; Adams et al., 2003) suggesting a role for GPR83  
299 in the stress response. Because of this known association with the glucocorticoid system, we  
300 used a single dose of dexamethasone to assess its effects on GPR83 expression, in both amygdala  
301 and the nucleus accumbens (NAc) of male and female mice. As a control, we examined  
302 proSAAS expression, since proSAAS is the precursor to the endogenous ligand for GPR83,  
303 PEN. We find that although dexamethasone administration has no effect on GPR83 expression in  
304 the amygdala of male mice and a decrease in expression in female mice (Figure 4A and B). In  
305 contrast, in the NAc, dexamethasone administration leads to an increase in GPR83 expression in  
306 male mice and a decrease in expression in female mice (Figure 4C and D). ProSAAS expression  
307 was unchanged by dexamethasone administration in either sex or two brain regions tested (Fig  
308 4A-D). These results suggest that GPR83 expression is regulated by glucocorticoids in a region-  
309 specific and sex-dependent manner.

310  
311 **The effect of GPR83 knockdown in the BLA, CeA and NAc on anxiety-related behaviors.**  
312 Since glucocorticoids, which are typically released during stressful events that produce anxiety,  
313 induce a decrease in GPR83 expression in the amygdala and NAc of female mice we sought to  
314 determine the effect of local GPR83 knockdown (GPR83 KD) in the BLA, CeA, and NAc on  
315 anxiety-related behaviors in female mice. The knockdown of GPR83 expression was  
316 accomplished by administration of GPR83 shRNA lentiviral particles (0.5  $\mu$ l @  $10^9$  particles/ $\mu$ l)  
317 into the BLA, CeA or NAc of female mice (Figure 5A, G and M) and anxiety-related behaviors  
318 analyzed using the elevated plus maze and open field tests and compared to mice that were  
319 administered with control virus. In a previous study we showed that this paradigm of lentiviral  
320 GPR83 shRNA administration produces a ~50% knockdown compared to control virus (Fakira et  
321 al., 2019). We find that local GPR83 KD in the BLA resulted in a decrease in the amount of time



322 spent (\*\*p<0.001) and frequency to enter (\*\*p<0.01) the open arm of the elevated plus maze  
323 indicating an increase in anxiety-related behaviors (Figure 5B and C, Student's t-test). However,  
324 these animals did not exhibit anxiety behaviors in the open field assay or overall locomotor  
325 activity (Figure 5D - F). GPR83 KD in the CeA or NAc had no effect on these behaviors except  
326 for a decrease in the frequency to enter the open arm of the elevated plus maze in the case of the  
327 NAc (Figure 5G-R). Overall, these data indicate that GPR83 expression in the BLA regulates  
328 anxiety levels in female mice however, revealing these differences depends on the sensitivity of  
329 the assay used.

330  
331 Next we examined the estrus cycle-dependency on anxiety following GPR83 KD in the BLA.  
332 For this, we monitored the estrus cycle by taking vaginal swabs immediately following  
333 behavioral testing which were categorized by two blind observers into the different stages by the  
334 presence of leukocytes, nucleated and cornified epithelial cells. Oestrus was defined as mice in  
335 the proestrus and estrus phase during which circulating hormone levels peak. Diestrus was  
336 defined as mice in metestrus and diestrus during which circulating hormone levels are lower  
337 (Wood et al., 2007; Miller and Takahashi, 2014). This analysis revealed that both oestrus and  
338 diestrus mice with GPR83 KD in the BLA exhibit significant decreases in time spent in the open  
339 arms indicating that the increases in anxiety are not estrus cycle-dependent (Figure 6B; 2-way  
340 ANOVA; Interaction  $F_{(1,21)}=0.75$ ,  $p=0.3955$ ; GPR83 KD  $F_{(1,21)}=22.83$ ,  $p=0.0001$ ; Estrus cycle  
341  $F_{(1,21)}=0.01$ ,  $p=0.9314$ ; Bonferroni post-hoc test, Oestrus Control virus vs GPR83 KD,  $p<0.0001$ ;  
342 Diestrus Control virus vs GPR83 KD  $p<0.05$ ). There was a trend for amygdala GPR83 KD mice  
343 in diestrus to enter the open arm less frequently than mice in oestrus (Figure 6 C; 2-way  
344 ANOVA; Interaction  $F_{(1,23)}=0.38$ ,  $p=0.5460$ ; GPR83 KD  $F_{(1,23)}=2.07$ ,  $p=0.1649$ ; Estrus cycle  
345  $F_{(1,23)}=1.50$ ,  $p=0.2328$ ; Student's test, Diestrus Control virus vs GPR83 shRNA,  $p<0.1272$ ).  
346 Finally, further analysis of estrus cycle effects reveals a possible effect of estrus cycle on center  
347 time and frequency to enter the center which may be explained by an overall decrease in activity  
348 of mice in diestrus revealed by decreases in locomotor activity (Figure 6D-F; 2-way ANOVA;  
349 Interaction  $F_{(1,26)}=0.02$ ,  $p=0.9023$ ; GPR83 KD  $F_{(1,26)}=0.00$ ,  $p=0.9668$ ; Estrus cycle  $F_{(1,26)}=3.94$ ,  
350  $p=0.0577$ ; Student's test Oestrus vs Diestrus, #  $p<0.05$ ). Together, these data indicate that there  
351 is no difference in anxiety behaviors between mice in oestrus vs diestrus however, diestrus  
352 decreases the overall activity levels of mice.

353

## 354 **Discussion**

355 Early studies have shown that GPR83 expression is regulated by the glucocorticoid  
356 receptor agonist dexamethasone (Harrigan et al., 1989; Adams et al., 2003), suggesting a role for  
357 GPR83 in stress and anxiety responses, since glucocorticoid release is a hallmark of the stress  
358 response. In fact, studies have reported that mice lacking GPR83 are resistant to stress-induced  
359 anxiety (Vollmer et al., 2013). However, these studies did not examine sex-differences or the  
360 specific brain regions where GPR83-mediated regulation of anxiety-related behavior may occur.

361 We found that global loss of GPR83 leads to a decrease in anxiety-related behaviors  
362 which is more prominent in male compared to female mice. In agreement with other studies  
363 (Simpson et al., 2012), we found that female wild type mice tend to display lower baseline levels  
364 of anxiety; this could account for the lack of effect of the global GPR83 KO on anxiety-related  
365 behaviors in female mice. In fact, these studies found that female mice were resistant to  
366 treatment with the anti-anxiety drug, diazepam, as compared to males, likely due to a floor effect  
367 in the female mice (Simpson et al., 2012). These data support the concept that lower baseline  
368 levels of anxiety in female mice may be a significant factor in screening treatments for anxiety.  
369 Together these data highlight the importance of examining the effectiveness of anxiety  
370 treatments on both males and females in preclinical models using multiple behavioral assays of  
371 anxiety, since specific assays may not be ideal for both sexes. In this context, future in-depth  
372 characterization of the role of GPR83 in anxiety will require screening in alternate assays besides  
373 the ones described in this study (elevated plus maze, open field), such as novelty suppressed  
374 feeding, marble burying etc. in order to fully understand the role of this receptor system in  
375 modulating nuances of anxiety behaviors.

376 There are several classes of drugs for the treatment of anxiety disorders including those  
377 that act to control the balance between GABA and glutamate transmission (Murrough et al.,  
378 2015). The BLA contains local inhibitory neurons that regulate excitatory projections to the  
379 CeA, ventral hippocampus (vHPC), medial prefrontal cortex (mPFC), bed nucleus of the stria  
380 terminalis (BNST), and NAc (Sah et al., 2003; Janak and Tye, 2015b; Tovote et al., 2015). While  
381 activation of the BLA projection to the mPFC and vHPC induces anxiety-related behaviors,  
382 activation of BLA projection to the CeA and BNST results in anxiolysis (Nascimento Häckl and  
383 Carobrez, 2007; Tye et al., 2011; Felix-Ortiz et al., 2013, 2016; Kim et al., 2013; Felix-Ortiz and  
384 Tye, 2014; Lowery-Gionta et al., 2018). Moreover, the circuits from the BLA to NAc and the  
385 BLA to CeA have been shown to encode positive and negative valence, respectively (Stuber et  
386 al., 2011; Namburi et al., 2015; Beyeler et al., 2016), suggesting that a complex network of  
387 circuits contribute to the overall anxiety state.

388 In our studies, complete removal of GPR83 in the knockout animal produced decreases in  
389 anxiety-related behaviors while specific knockdown in the BLA resulted in more anxiety-related  
390 behaviors. One reason for this discrepancy between the effect of global knockout versus local  
391 knockdown in the BLA may be due to an imbalance in these outgoing circuitries, suggesting the  
392 GPR83 tone from BLA contributes more to the anxiolysis, since there is an increase in anxiety  
393 with loss of GPR83 in this region, while global KO of GPR83 expression offsets this change in  
394 amygdalar tone. Previous studies have detected GPR83 expression in the PFC, hypothalamus,  
395 NAc, hippocampus and BNST (Pesini et al., 1998; Brezillon et al., 2001; Wang et al., 2001;  
396 Eberwine and Bartfai, 2011; Dubins et al., 2012; Müller et al., 2013; Lueptow et al., 2018; Fakira  
397 et al., 2019), though the role of GPR83 in each of these brain regions has yet to be explored. The  
398 current studies suggest that removing GPR83 from all these regions may shift the overall output  
399 in a direction which favors less anxiety and the mechanisms that underlie this remains to be  
400 examined.

401           Though reducing expression of GPR83 in the BLA uncovered a shift towards increasing  
402 anxiety-related behaviors, GPR83 KD in the CeA and NAc had little to no effect. Previous  
403 studies showed that blocking excitatory output from the BLA to the CeA or mPFC resulted in a  
404 shift towards increasing anxiety-related behaviors (Tye et al., 2011; Felix-Ortiz et al., 2016;  
405 Lowery-Gionta et al., 2018). Therefore, it is possible that GPR83 expression on interneurons in  
406 the BLA regulates inhibitory control. In line with this concept, our studies identified GPR83  
407 expression on parvalbumin positive GABAergic neurons, which are known to form perisomatic  
408 synapses, i.e. along the soma, axon initial segment and proximal dendrites, of excitatory  
409 pyramidal neurons in the BLA representing half of their inhibitory input (McDonald and  
410 Mascagni, 2001; Muller et al., 2006). Therefore, these parvalbumin expressing neurons are in a  
411 prime position to gate output from the BLA. Furthermore, recent studies demonstrated that  
412 suppressing parvalbumin neuron activity in the BLA upregulates anxiety-related behaviors (Luo  
413 et al., 2020) similar to the increases in anxiety seen following GPR83 knockdown in the BLA.  
414 This suggests that reducing GPR83 expression on parvalbumin neurons may suppress  
415 parvalbumin neuron activity thereby resulting in a net increase in excitatory output to  
416 downstream brain regions. In order to determine the role of GPR83 on excitatory circuits in the  
417 BLA, future studies investigating the impact of GPR83 knockdown on inhibitory and excitatory  
418 neurotransmission are necessary.

419           Because GPR83 has been implicated in anxiety-related behaviors, and subcellular  
420 regulation of the receptor is altered by stress-related glucocorticoids, we investigated the impact  
421 of the glucocorticoid agonist, dexamethasone, on regulation of GPR83 expression in a sex and  
422 brain region specific manner. In the amygdala, we find that dexamethasone treatment reduced  
423 GPR83 expression in female mice but had no effect in males. Consistent with this a previous  
424 study using male mice reported that GPR83 expression in the amygdala was not effected by  
425 dexamethasone treatment (Adams et al., 2003). Our behavioral studies indicate divergent sex  
426 effects of GPR83 on behavior. In the NAc, we find that dexamethasone induced opposing effects  
427 on GPR83 expression, increasing expression in males while decreasing expression in females.  
428 Our observations with male mice are in contrast to those of Adams et al (2003) that reported  
429 decrease in GPR83 expression in NAc following dexamethasone treatment. This discrepancy  
430 could be due to a number of factors including the strain of mice used (C57Bl6 vs ICR),  
431 sensitivity of the technique used (in situ hybridization vs real-time qPCR), and/or the effects of  
432 oestrus cycle hormones in the female mice.

433           We have also found variability in GPR83 expression in individual male mice. It is known  
434 that the levels of corticosterone, the naturally occurring glucocorticoid in rodents, are higher in  
435 females compared to males (Nguyen et al., 2020). Based on this, female mice may have more  
436 stable expression of glucocorticoid regulated proteins such as GPR83 which may explain why  
437 female mice have less variable GPR83 expression. Additionally, this may explain why the effect  
438 of dexamethasone on GPR83 was more consistent between brain regions in females, where we  
439 observed a dexamethasone-induced decrease in both the NAc and amygdala. The higher levels of

440 corticosterone in females may also contribute to the sex-differences in baseline anxiety and  
441 GPR83-mediated regulation of anxiety levels reported above.

442 Another important finding of this study is that knockdown of GPR83 in the BLA of  
443 female mice increased anxiety-related behaviors in the EPM test irrespective of whether the  
444 animals were in the oestrus or diestrus stage. GPR83 expression in the uterus is regulated during  
445 the estrus cycle in an estrogen and progesterone dependent manner (Parobchak et al., 2020)  
446 suggesting that circulating hormone levels may influence GPR83 function. Studies have shown  
447 that females in proestrus display decreased anxiety-related behaviors which corresponded with  
448 higher levels of progesterone and its metabolite 5 $\alpha$ -pregnan-3 $\alpha$ -ol-20-one (3 $\alpha$ -5 $\alpha$ -THP;  
449 allopregnalone) (Frye et al., 2000). In line with this, treatment of ovariectomized rats with  
450 progesterone is anxiolytic and corresponded with the potentiation of GABA<sub>A</sub> receptor currents  
451 (Gulinello and Smith, 2003). Subsequent studies found that administration of allopregnalone is  
452 anxiolytic when administered acutely. However, chronic allopregnalone treatment is anxiogenic  
453 in both male and female mice and alters the anxiolytic potential of the benzodiazepine ligands  
454 lorazepam and flumazenil (Gulinello and Smith, 2003).

455 Our studies did not identify any differences in anxiety between wild type females in  
456 oestrus versus diestrus. This may be because in our studies we had pooled mice in groups with  
457 high circulating hormones (oestrus- proestrus/estrus) and low circulating hormones (diestrus-  
458 metestrus/diestrus) (Miller and Takahashi, 2014). By pooling together animals with varying  
459 levels of individual hormones, these differences in anxiety levels may have reached below  
460 detectable threshold. Given the role of progesterone/allopregnalone in modulating anxiety-  
461 related behaviors via regulation of GABAergic function, and that GPR83 expression is regulated  
462 by estrogen and progesterone in the uterus (Parobchak et al., 2020) further studies are needed to  
463 determine if there is a relationship between GPR83 and progesterone levels in the brain.

464 In summary, our studies suggest that GPR83 is differentially regulated between male and  
465 female mice. Furthermore, regional changes in expression of GPR83 significantly impacts the  
466 overall tone of anxiety-related circuitry, and specifically, GPR83 expression in the BLA may be  
467 a primary output node for regulating anxiety-related behavior.

468  
469 Acknowledgements: The authors wish to thank Andrei Jeltyi for assistance in genotyping and  
470 animal husbandry and Dr. Ivone Gomes for critical reading of the manuscript. This work was  
471 supported by NIH grants R01-DA008863 and R01-NS026880 (to LAD). Authors have no conflict  
472 of interest.

473  
474  
475  
476  
477  
478  
479  
480  
481

482 **Figure Legends**

483 **Figure 1: Mice lacking GPR83 have a decrease in anxiety-related behaviors.** Wild type  
484 (WT) and GPR83 knockout (KO) mice were screened on the elevated plus maze (A) and the  
485 amount of time spent on the open arms (B) and frequency to enter the open arms (C) measured.  
486 WT and GPR83 KO mice were screened in an open field assay (D) and the amount of time spent  
487 in the center (E), frequency to enter to center (F) and distance traveled (G) measured. Data are  
488 represented as mean  $\pm$  SEM and analyzed using Student's T-test, % = open arm time/ (open arm  
489 + closed arm time), \* $p < 0.05$ ; \*\* $p < 0.01$ ; WT,  $n = 41$ ; GPR83 KO,  $n = 32$ .

490  
491 **Figure 2: Sex-differences in GPR83-mediated regulation of anxiety-related behaviors.** Sex-  
492 dependent analysis of WT and GPR83 KO mice on the elevated plus maze (A) measuring open  
493 arm time (B) and frequency to enter the open arm (C). Sex-dependent analysis of WT and  
494 GPR83 KO mice in the open field assay (D) measuring center time (E), frequency to enter the  
495 center (F) and distance traveled (G). Data are represented as mean  $\pm$  SEM and analyzed using 2-  
496 way ANOVA following Bonferroni's post-hoc test (\* $p < 0.05$ ) and Student's T-test, % = open arm  
497 time/ (open arm + closed arm time), @  $p = 0.0872$ ; # $p < 0.05$ , ## $p < 0.01$ ; WT males,  $n = 19$ , GPR83  
498 KO males,  $n = 11$ ; WT females,  $n = 22$ , GPR83 KO females,  $n = 21$ .

499  
500 **Figure 3: GPR83 expression in the basolateral and central nucleus of the amygdala.** (A) In  
501 situ hybridization image for GPR83 from the Allen Mouse Brain Atlas (Allen Institute.  
502 © 2015 Allen Institute for Brain Science. Allen Brain Atlas API) (left) and corresponding brain  
503 atlas image (right). (B) Enlarged image of BLA and CeA shown in (A). Low magnification  
504 image of GPR83 (green) expression in the BLA and CeA (C-D) using GPR83-GFP reporter mice  
505 from Gensat. (E) Higher magnification image showing GPR83 expression in neurons in the  
506 amygdala. (F) Co-localization (yellow, stars) of GPR83 (green, G) and parvalbumin (red, H) in  
507 the BLA and CeA. (I) Co-localization (yellow, stars) of GPR83 (green, J) and parvalbumin (red,  
508 K) in the NAc. AC, anterior commissure.

509  
510 **Figure 4: GPR83 expression is regulated by dexamethasone in the amygdala and nucleus**  
511 **accumbens in a sex-dependent manner.** (A and B) Administration of dexamethasone (5  
512 mg/kg) decreases expression of GPR83 in the amygdala of female mice but not males with no  
513 effects on proSAAS expression. (C and D) In the NAc, administration of dexamethasone  
514 increases expression of GPR83 in males and decreases the expression in females. The proSAAS  
515 expression is unchanged in all cases. Data are represented as mean  $\pm$  SEM and analyzed using  
516 Student's T-test, \* $p < 0.05$ ,  $n = 3-4$  per group.

517  
518 **Figure 5: GPR83 knockdown in the BLA, but not the CeA or NAc increases anxiety-related**  
519 **behaviors in female mice.** Schematic of injection of control or GPR83 shRNA lentivirus into  
520 the (A) BLA, (G) CeA or (M) nucleus accumbens. Effect of brain region specific GPR83  
521 knockdown in mice on open arm time in the elevated plus maze (B, H, N) and on the frequency  
522 to enter the open arm (C, I, O). Effect of brain region specific GPR83 knockdown in mice on the



523 center time in the open field assay (**D, J, P**), on frequency to enter the center (**E, K, Q**) and on  
524 the distance traveled (**F, L, R**). Data are represented as mean  $\pm$  SEM and analyzed using  
525 Student's T-test, % = open arm time/ (open arm + closed arm time), \* $p < 0.05$ , \*\* $p < 0.01$ ,  
526 \*\*\* $p < 0.001$ , BLA, CV n= 11, GPR83 shRNA n=14; CeA, CV n= 7, GPR83 shRNA n=8; NAc,  
527 CV n=8, GPR84 shRNA n=8.

528  
529 **Figure 6: Analysis of estrus cycle-dependent differences in anxiety-related behaviors**  
530 **following GPR83 knockdown in the BLA.** (A) Schematic of injection of control or GPR83  
531 shRNA lentivirus into the BLA. Analysis of estrus cycle-dependent differences following  
532 GPR83 knockdown in the BLA, on the elevated plus maze and open field assays, measuring  
533 open arm time (**B**), frequency to enter the open arm (**C**), center time (**D**), frequency to enter the  
534 center (**E**) and distance traveled (**F**). Data are represented as mean  $\pm$  SEM and analyzed using 2-  
535 way ANOVA following Bonferroni's post-hoc test, % = open arm time/ (open arm + closed arm  
536 time), \* $p < 0.05$ , \*\*\* $p < 0.001$ , Student's t-test, # $p < 0.05$ ; n=3-11 per group.

537  
538  
539  
540  
541  
542  
543  
544  
545  
546  
547  
548  
549  
550  
551  
552  
553  
554  
555  
556  
557  
558  
559  
560  
561  
562



563

564 **References**

- 565 Adams, F., Grassie, M., Shahid, M., Hill, D. R., and Henry, B. (2003). Acute oral  
566 dexamethasone administration reduces levels of orphan GPCR glucocorticoid-induced  
567 receptor (GIR) mRNA in rodent brain: Potential role in HPA-axis function. *Mol. Brain Res.*  
568 117, 39–46. doi:10.1016/S0169-328X(03)00280-8.
- 569 Babaev, O., Piletti Chatain, C., and Krueger-Burg, D. (2018). Inhibition in the amygdala anxiety  
570 circuitry. *Exp. Mol. Med.* doi:10.1038/s12276-018-0063-8.
- 571 Berezniuk, I., Rodriguiz, R. M., Zee, M. L., Marcus, D. J., Pintar, J., Morgan, D. J., et al. (2017).  
572 ProSAAS-derived peptides are regulated by cocaine and are required for sensitization to the  
573 locomotor effects of cocaine. *J. Neurochem.* doi:10.1111/jnc.14209.
- 574 Beyeler, A., Namburi, P., Glober, G. F., Simonnet, C., Calhoun, G. G., Conyers, G. F., et al.  
575 (2016). Divergent Routing of Positive and Negative Information from the Amygdala during  
576 Memory Retrieval. *Neuron.* doi:10.1016/j.neuron.2016.03.004.
- 577 Bobeck, E. N., Gomes, I., Pena, D., Cummings, K. A., Clem, R. L., Mezei, M., et al. (2017). The  
578 BigLEN-GPR171 peptide receptor system within the basolateral amygdala regulates  
579 anxiety-like behavior and contextual fear conditioning. *Neuropsychopharmacology.*  
580 doi:10.1038/npp.2017.79.
- 581 Boivin, J. R., Piekarski, D. J., Wahlberg, J. K., and Wilbrecht, L. (2017). Age, sex, and gonadal  
582 hormones differently influence anxiety- and depression-related behavior during puberty in  
583 mice. *Psychoneuroendocrinology.* doi:10.1016/j.psyneuen.2017.08.009.
- 584 Brezillon, S., Detheux, M., Parmentier, M., Hokfelt, T., and Hurd, Y. L. (2001). Distribution of  
585 an orphan G-protein coupled receptor (JP05) mRNA in the human brain. *Brain Res.* 921,  
586 21–30. doi:S0006-8993(01)03068-2 [pii].
- 587 Dubins, J. S., Sanchez-Alavez, M., Zhukov, V., Sanchez-Gonzalez, A., Moroncini, G., Carvajal-  
588 Gonzalez, S., et al. (2012). Downregulation of GPR83 in the hypothalamic preoptic area  
589 reduces core body temperature and elevates circulating levels of adiponectin. *Metabolism.*  
590 61, 1486–1493. doi:10.1016/j.metabol.2012.03.015.
- 591 Eberwine, J., and Bartfai, T. (2011). Single cell transcriptomics of hypothalamic warm sensitive  
592 neurons that control core body temperature and fever response: Signaling asymmetry and an  
593 extension of chemical neuroanatomy. *Pharmacol. Ther.* 129, 241–259.  
594 doi:10.1016/j.pharmthera.2010.09.010.
- 595 Enterría-Morales, D., del Rey, N. L.-G., Blesa, J., López-López, I., Gallet, S., Prévot, V., et al.  
596 (2020). Molecular targets for endogenous glial cell line-derived neurotrophic factor  
597 modulation in striatal parvalbumin interneurons. *Brain Commun.*  
598 doi:10.1093/braincomms/fcaa105.
- 599 Fakira, A. K., Peck, E. G., Liu, Y., Lueptow, L. M., Trimbake, N. A., Han, M. H., et al. (2019).  
600 The role of the neuropeptide PEN receptor, GPR83, in the reward pathway: Relationship to  
601 sex-differences. *Neuropharmacology.* doi:10.1016/j.neuropharm.2019.107666.
- 602 Felix-Ortiz, A. C., Beyeler, A., Seo, C., Leppla, C. A., Wildes, C. P., and Tye, K. M. (2013).  
603 BLA to vHPC inputs modulate anxiety-related behaviors. *Neuron.*  
604 doi:10.1016/j.neuron.2013.06.016.
- 605 Felix-Ortiz, A. C., Burgos-Robles, A., Bhagat, N. D., Leppla, C. A., and Tye, K. M. (2016).  
606 Bidirectional modulation of anxiety-related and social behaviors by amygdala projections to  
607 the medial prefrontal cortex. *Neuroscience.* doi:10.1016/j.neuroscience.2015.07.041.
- 608 Felix-Ortiz, A. C., and Tye, K. M. (2014). Amygdala inputs to the ventral hippocampus

- 609 bidirectionally modulate social behavior. *J. Neurosci.* doi:10.1523/JNEUROSCI.4257-  
610 13.2014.
- 611 Foster, S. R., Hauser, A. S., Vedel, L., Strachan, R. T., Huang, X. P., Gavin, A. C., et al. (2019).  
612 Discovery of Human Signaling Systems: Pairing Peptides to G Protein-Coupled Receptors.  
613 *Cell.* doi:10.1016/j.cell.2019.10.010.
- 614 Fricker, L. D., McKinzie, A. A., Sun, J., Curran, E., Qian, Y., Yan, L., et al. (2000).  
615 Identification and characterization of proSAAS, a granin-like neuroendocrine peptide  
616 precursor that inhibits prohormone processing. *J. Neurosci.* doi:10.1523/jneurosci.20-02-  
617 00639.2000.
- 618 Frye, C. A., Petralia, S. M., and Rhodes, M. E. (2000). Estrous cycle and sex differences in  
619 performance on anxiety tasks coincide with increases in hippocampal progesterone and  
620  $3\alpha,5\alpha$ -THP. *Pharmacol. Biochem. Behav.* doi:10.1016/S0091-3057(00)00392-0.
- 621 Gilpin, N. W., Herman, M. A., and Roberto, M. (2015). The Central Amygdala as an Integrative  
622 Hub for Anxiety and Alcohol Use Disorders. *Biol. Psychiatry* 77, 859–869.  
623 doi:10.1016/j.biopsych.2014.09.008.
- 624 Gomes, I., Bobeck, E. N., Margolis, E. B., Gupta, A., Sierra, S., Fakira, A. K., et al. (2016).  
625 Identification of GPR83 as the receptor for the neuroendocrine peptide PEN. *Sci. Signal.* 9.  
626 doi:10.1126/scisignal.aad0694.
- 627 Griebel, G., and Holmes, A. (2013). 50 years of hurdles and hope in anxiolytic drug discovery.  
628 *Nat. Rev. Drug Discov.* doi:10.1038/nrd4075.
- 629 Gulinello, M., and Smith, S. S. (2003). Anxiogenic effects of neurosteroid exposure: Sex  
630 differences and altered GABAA receptor pharmacology in adult rats. *J. Pharmacol. Exp.*  
631 *Ther.* doi:10.1124/jpet.102.045120.
- 632 Harrigan, M. T., Baughman, G., Campbell, N. F., and Bourgeois, S. (1989). Isolation and  
633 characterization of glucocorticoids- and cyclic AMP-induced genes in T lymphocytes. *Mol.*  
634 *Cell. Biol.* 9, 3438–3446.
- 635 Harrigan, M. T., Campbell, N. F., and Bourgeois, S. (1991). Identification of a gene induced by  
636 glucocorticoids in murine T-cells: a potential G protein-coupled receptor. *Mol. Endocrinol.*  
637 5, 1331–1338. doi:10.1210/mend-5-9-1331.
- 638 Hoshino, A., Helwig, M., Rezaei, S., Berridge, C., Eriksen, J. L., and Lindberg, I. (2014). A  
639 novel function for proSAAS as an amyloid anti-aggregant in Alzheimer’s disease. *J.*  
640 *Neurochem.* 128, 419–430. doi:10.1111/jnc.12454.
- 641 Janak, P. H., and Tye, K. M. (2015a). From circuits to behaviour in the amygdala. *Nature* 517,  
642 284–292. doi:10.1038/nature14188.
- 643 Janak, P. H., and Tye, K. M. (2015b). From circuits to behaviour in the amygdala. *Nature.*  
644 doi:10.1038/nature14188.
- 645 Kim, S. Y., Adhikari, A., Lee, S. Y., Marshel, J. H., Kim, C. K., Mallory, C. S., et al. (2013).  
646 Diverging neural pathways assemble a behavioural state from separable features in anxiety.  
647 *Nature.* doi:10.1038/nature12018.
- 648 Lowery-Gionta, E. G., Crowley, N. A., Bukalo, O., Silverstein, S., Holmes, A., and Kash, T. L.  
649 (2018). Chronic stress dysregulates amygdalar output to the prefrontal cortex.  
650 *Neuropharmacology.* doi:10.1016/j.neuropharm.2018.06.032.
- 651 Lu, L. F., Gavin, M. A., Rasmussen, J. P., and Rudensky, A. Y. (2007). G protein-coupled  
652 receptor 83 is dispensable for the development and function of regulatory T cells. *Mol Cell*  
653 *Biol* 27, 8065–8072. doi:10.1128/MCB.01075-07.
- 654 Lueptow, L. M., Devi, L. A., and Fakira, A. K. (2018). Targeting the Recently Deorphanized

- 655 Receptor GPR83 for the Treatment of Immunological, Neuroendocrine and  
656 Neuropsychiatric Disorders. *Prog. Mol. Biol. Transl. Sci.*  
657 doi:10.1016/bs.pmbts.2018.07.002.
- 658 Luo, Z. Y., Huang, L., Lin, S., Yin, Y. N., Jie, W., Hu, N. Y., et al. (2020). Erbin in Amygdala  
659 Parvalbumin-Positive Neurons Modulates Anxiety-like Behaviors. *Biol. Psychiatry.*  
660 doi:10.1016/j.biopsych.2019.10.021.
- 661 Mack, S. M., Gomes, I., and Devi, L. A. (2019). Neuropeptide PEN and Its Receptor GPR83:  
662 Distribution, Signaling, and Regulation. *ACS Chem. Neurosci.*  
663 doi:10.1021/acchemneuro.8b00559.
- 664 McDonald, A. J., and Mascagni, F. (2001). Colocalization of calcium-binding proteins and  
665 GABA in neurons of the rat basolateral amygdala. *Neuroscience.* doi:10.1016/S0306-  
666 4522(01)00214-7.
- 667 McLean, A. C., Valenzuela, N., Fai, S., and Bennett, S. A. L. (2012). Performing vaginal lavage,  
668 crystal violet staining, and vaginal cytological evaluation for mouse estrous cycle staging  
669 identification. *J. Vis. Exp.* doi:10.3791/4389.
- 670 Miller, B. H., and Takahashi, J. S. (2014). Central circadian control of female reproductive  
671 function. *Front. Endocrinol. (Lausanne).* doi:10.3389/fendo.2013.00195.
- 672 Morgan, D. J., Wei, S., Gomes, I., Czyzyk, T., Mzhavia, N., Pan, H., et al. (2010). The  
673 propeptide precursor proSAAS is involved in fetal neuropeptide processing and body  
674 weight regulation. *J. Neurochem.* 113, 1275–1284. doi:10.1111/j.1471-4159.2010.06706.x.
- 675 Muller, J. F., Mascagni, F., and McDonald, A. J. (2006). Pyramidal cells of the rat basolateral  
676 amygdala: Synaptology and innervation by parvalbumin-immunoreactive interneurons. *J.*  
677 *Comp. Neurol.* doi:10.1002/cne.20832.
- 678 Müller, T. D., Müller, A., Yi, C. X., Habegger, K. M., Meyer, C. W., Gaylinn, B. D., et al.  
679 (2013). The orphan receptor Gpr83 regulates systemic energy metabolism via ghrelin-  
680 dependent and ghrelin-independent mechanisms. *Nat. Commun.* 4.  
681 doi:10.1038/ncomms2968.
- 682 Murrough, J. W., Yaquobi, S., Sayed, S., and Charney, D. S. (2015). Emerging drugs for the  
683 treatment of anxiety. *Expert Opin. Emerg. Drugs.* doi:10.1517/14728214.2015.1049996.
- 684 Mzhavia, N., Qian, Y., Feng, Y., Che, F., DEVI, L., and FRICKER, L. (2002). Processing of  
685 proSAAS in neuroendocrine cell lines. *Biochem. J* 76, 67–76. doi:10.1042/0264-  
686 6021:3610067.
- 687 Namburi, P., Beyeler, A., Yorozu, S., Calhoon, G. G., Halbert, S. A., Wichmann, R., et al.  
688 (2015). A circuit mechanism for differentiating positive and negative associations. *Nature.*  
689 doi:10.1038/nature14366.
- 690 Nascimento Häckl, L. P., and Carobrez, A. P. (2007). Distinct ventral and dorsal hippocampus  
691 AP5 anxiolytic effects revealed in the elevated plus-maze task in rats. *Neurobiol. Learn.*  
692 *Mem.* doi:10.1016/j.nlm.2007.04.007.
- 693 Nguyen, K., Kanamori, K., Shin, C. S., Hamid, A., and Lutfy, K. (2020). The impact of sex on  
694 changes in plasma corticosterone and cotinine levels induced by nicotine in c57bl/6j mice.  
695 *Brain Sci.* doi:10.3390/brainsci10100705.
- 696 Palanza, P. (2001). Animal models of anxiety and depression: How are females different?  
697 *Neurosci. Biobehav. Rev.* doi:10.1016/S0149-7634(01)00010-0.
- 698 Parobchak, N., Rao, S., Negron, A., Schaefer, J., Bhattacharya, M., Radovick, S., et al. (2020).  
699 Uterine Gpr83 mRNA is highly expressed during early pregnancy and GPR83 mediates the  
700 actions of PEN in endometrial and non-endometrial cells. *F&S Sci.*

- 701           doi:10.1016/j.xfss.2020.06.001.
- 702 Paxinos, G., and Franklin, K. B. J. (2012). *Paxinos and Franklin's the Mouse Brain in*  
703 *Stereotaxic Coordinates*.
- 704 Pesini, P., Dethoux, M., Parmentier, M., and Hökfelt, T. (1998). Distribution of a glucocorticoid-  
705 induced orphan receptor (JP05) mRNA in the central nervous system of the mouse. *Mol.*  
706 *Brain Res.* 57, 281–300. doi:10.1016/S0169-328X(98)00099-0.
- 707 Ravenelle, R., Neugebauer, N. M., Niedzielak, T., and Donaldson, S. T. (2014). Sex differences  
708 in diazepam effects and parvalbumin-positive GABA neurons in trait anxiety Long Evans  
709 rats. *Behav. Brain Res.* doi:10.1016/j.bbr.2014.04.048.
- 710 Sah, P., Faber, E. S. L., De Armentia, M. L., and Power, J. (2003). The amygdaloid complex:  
711 Anatomy and physiology. *Physiol. Rev.* doi:10.1152/physrev.00002.2003.
- 712 Simpson, J., Ryan, C., Curley, A., Mulcaire, J., and Kelly, J. P. (2012). Sex differences in  
713 baseline and drug-induced behavioural responses in classical behavioural tests. *Prog.*  
714 *Neuro-Psychopharmacology Biol. Psychiatry.* doi:10.1016/j.pnpbp.2012.02.004.
- 715 Stuber, G. D., Sparta, D. R., Stamatakis, A. M., Van Leeuwen, W. A., Hardjoprajitno, J. E., Cho,  
716 S., et al. (2011). Excitatory transmission from the amygdala to nucleus accumbens  
717 facilitates reward seeking. *Nature* 475, 377–382. doi:10.1038/nature10194.
- 718 Tovote, P., Fadok, J. P., and Lüthi, A. (2015). Neuronal circuits for fear and anxiety. *Nat. Rev.*  
719 *Neurosci.* doi:10.1038/nrn3945.
- 720 Tye, K. M., Prakash, R., Kim, S. Y., Fenno, L. E., Grosenick, L., Zarabi, H., et al. (2011).  
721 Amygdala circuitry mediating reversible and bidirectional control of anxiety. *Nature.*  
722 doi:10.1038/nature09820.
- 723 Urakawa, S., Takamoto, K., Hori, E., Sakai, N., Ono, T., and Nishijo, H. (2013). Rearing in  
724 enriched environment increases parvalbumin-positive small neurons in the amygdala and  
725 decreases anxiety-like behavior of male rats. *BMC Neurosci.* doi:10.1186/1471-2202-14-13.
- 726 Vollmer, L., Ghosal, S., A Rush, J., R Sallee, F., P Herman, J., Weinert, M., et al. (2013).  
727 Attenuated stress-evoked anxiety, increased sucrose preference and delayed spatial learning  
728 in glucocorticoid-induced receptor-deficient mice. *Genes. Brain. Behav.* 12, 241–9.  
729 doi:10.1111/j.1601-183X.2012.00867.x.
- 730 Wang, J., Cunningham, R., Zetterberg, H., Asthana, S., Carlsson, C., Okonkwo, O., et al.  
731 (2016a). Label-free quantitative comparison of cerebrospinal fluid glycoproteins and  
732 endogenous peptides in subjects with Alzheimer's disease, mild cognitive impairment, and  
733 healthy individuals. *Proteomics - Clin. Appl.* doi:10.1002/prca.201600009.
- 734 Wang, J.P., H., L.M., P., R.H., S., R.L., A., G.L., K., et al. (2001). Cloning, expression and  
735 regulation of a glucocorticoid-induced receptor in rat brain: effect of repetitive  
736 amphetamine. *J. Neurosci.* 21, 9027–9035.
- 737 Wang, L., Shen, M., Jiang, C., Ma, L., and Wang, F. (2016b). Parvalbumin interneurons of  
738 central amygdala regulate the negative affective states and the expression of corticotrophin-  
739 releasing hormone during morphine withdrawal. *Int. J. Neuropsychopharmacol.*  
740 doi:10.1093/ijnp/pyw060.
- 741 Wardman, J. H., Berezniuk, I., Di, S., Tasker, J. G., and Fricker, L. D. (2011). ProSAAS-derived  
742 peptides are colocalized with neuropeptide Y and function as neuropeptides in the  
743 regulation of food intake. *PLoS One* 6. doi:10.1371/journal.pone.0028152.
- 744 Wei, S., Feng, Y., Che, F.-Y., Pan, H., Mzhavia, N., Devi, L. A., et al. (2004). Obesity and  
745 diabetes in transgenic mice expressing proSAAS. *J. Endocrinol.* 180.  
746 doi:10.1677/joe.0.1800357.

- 747 Wood, G. A., Fata, J. E., Watson, K. L. M., and Khokha, R. (2007). Circulating hormones and  
748 estrous stage predict cellular and stromal remodeling in murine uterus. *Reproduction*.  
749 doi:10.1530/REP-06-0302.
- 750 Xiao, Q., Zhou, X., Wei, P., Xie, L., Han, Y., Wang, J., et al. (2020). A new GABAergic  
751 somatostatin projection from the BNST onto accumbal parvalbumin neurons controls  
752 anxiety. *Mol. Psychiatry*. doi:10.1038/s41380-020-0816-3.
- 753 Zhu, Z., Wang, G., Ma, K., Cui, S., and Wang, J.-H. (2017). GABAergic neurons in nucleus  
754 accumbens are correlated to resilience and vulnerability to chronic stress for major  
755 depression. *Oncotarget*. doi:10.18632/oncotarget.16411.
- 756 Zuloaga, D. G., Heck, A. L., De Guzman, R. M., and Handa, R. J. (2020). Roles for androgens in  
757 mediating the sex differences of neuroendocrine and behavioral stress responses. *Biol. Sex*  
758 *Differ*. doi:10.1186/s13293-020-00319-2.
- 759







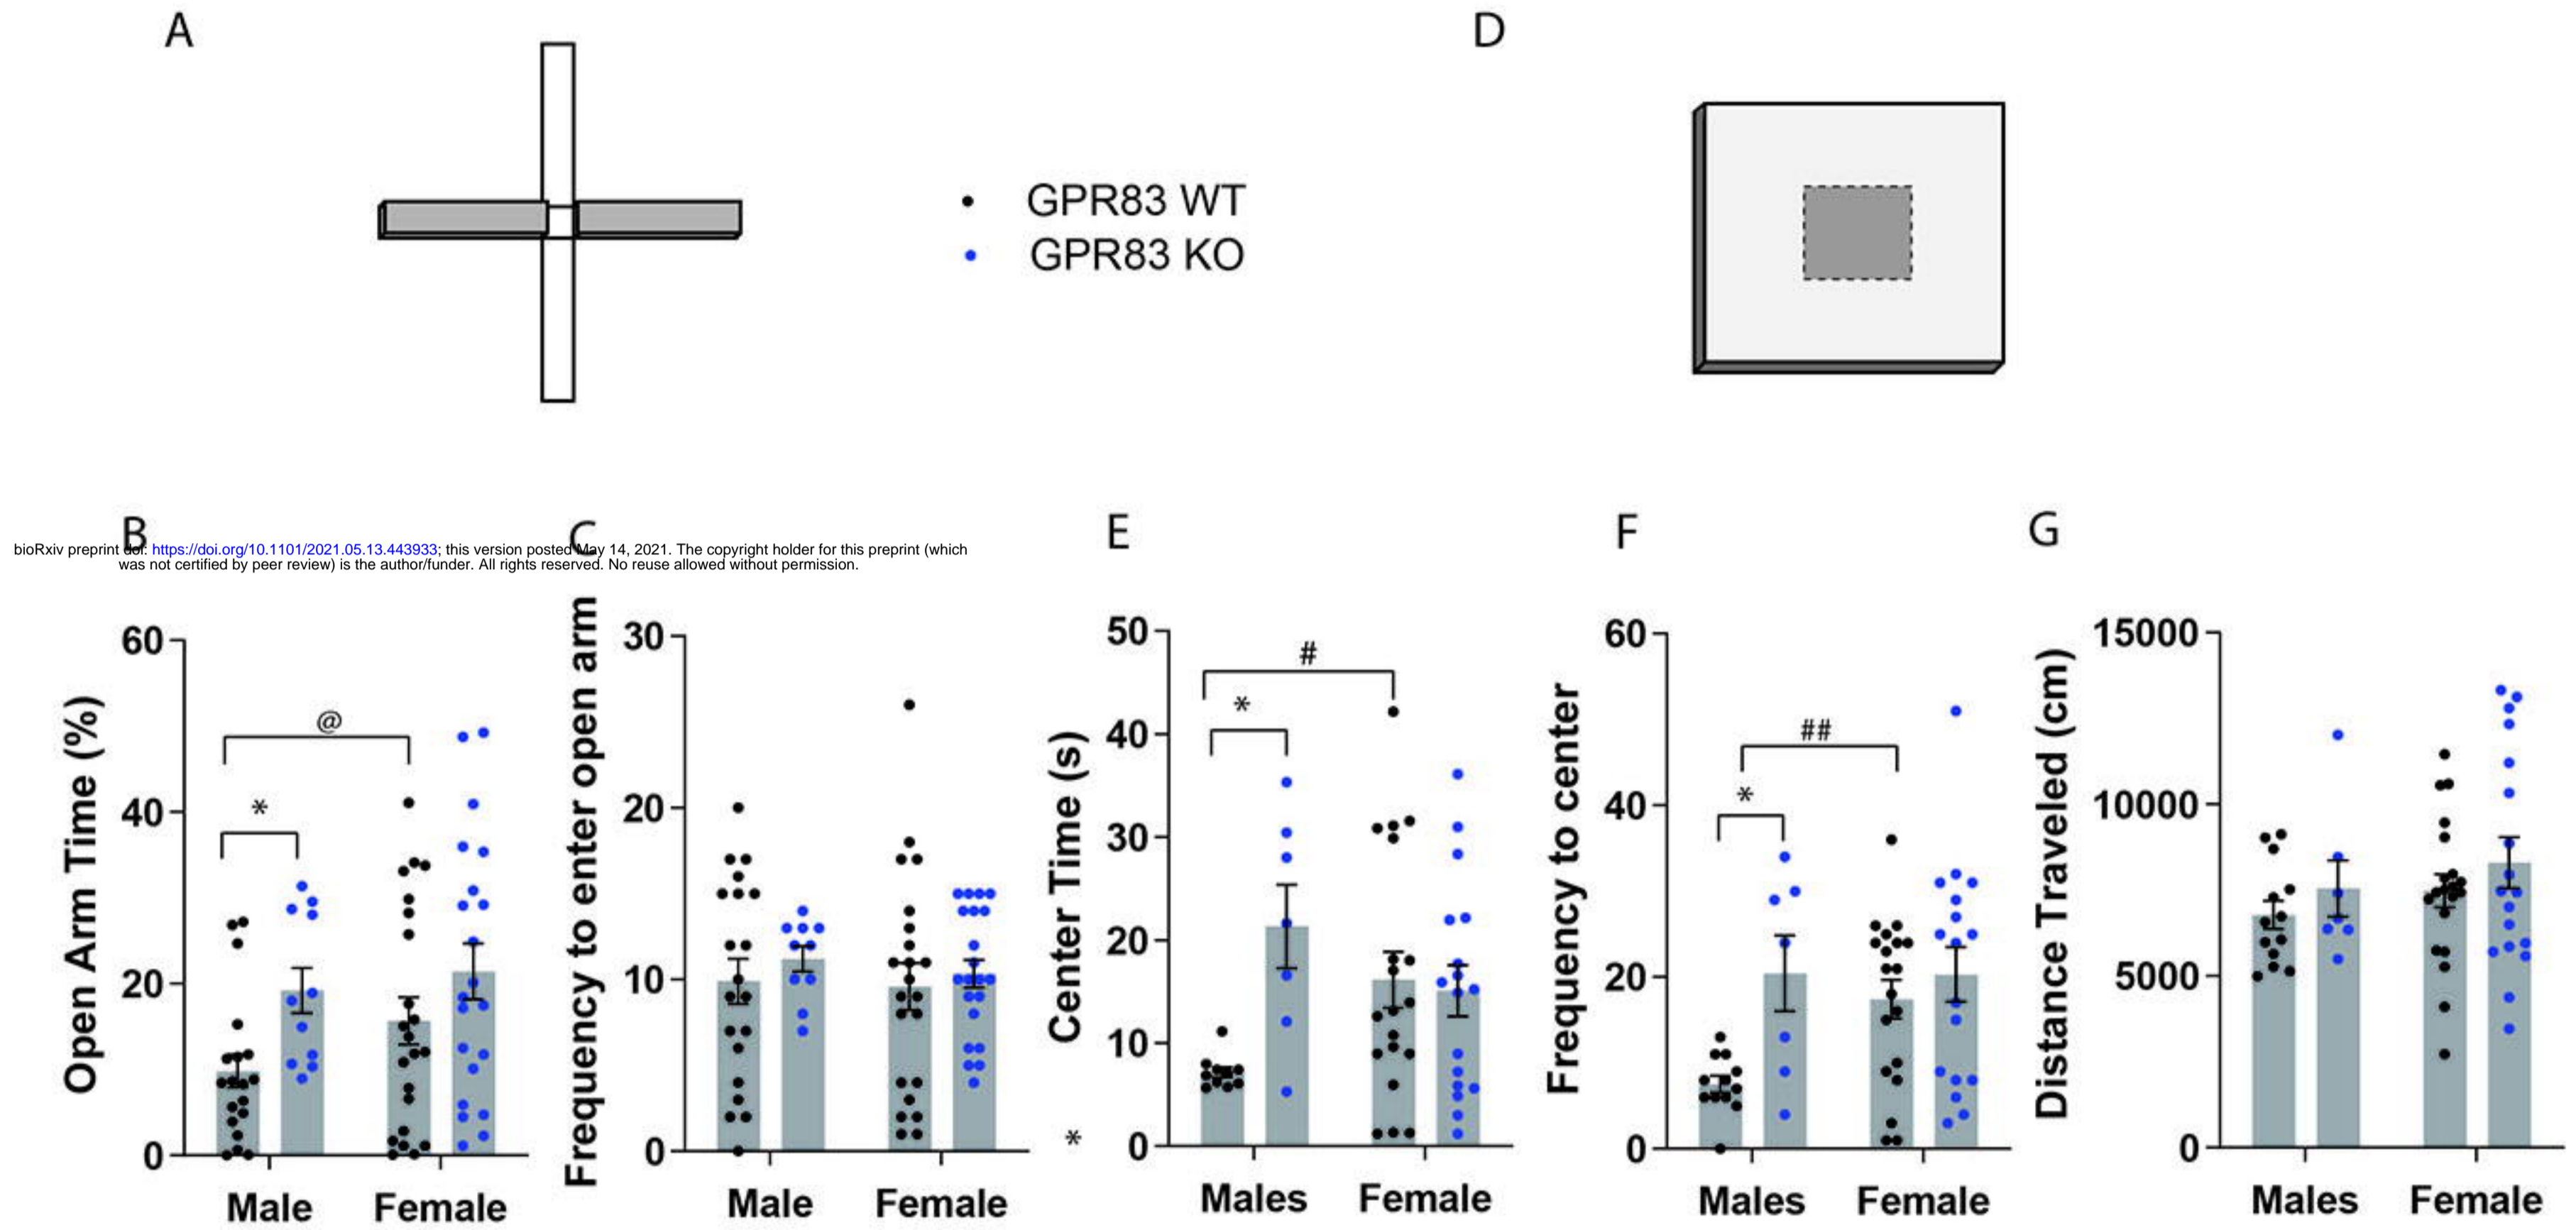

bioRxiv preprint doi: <https://doi.org/10.1101/2021.05.13.443933>; this version posted May 14, 2021. The copyright holder for this preprint (which was not certified by peer review) is the author/funder. All rights reserved. No reuse allowed without permission.

Figure 2



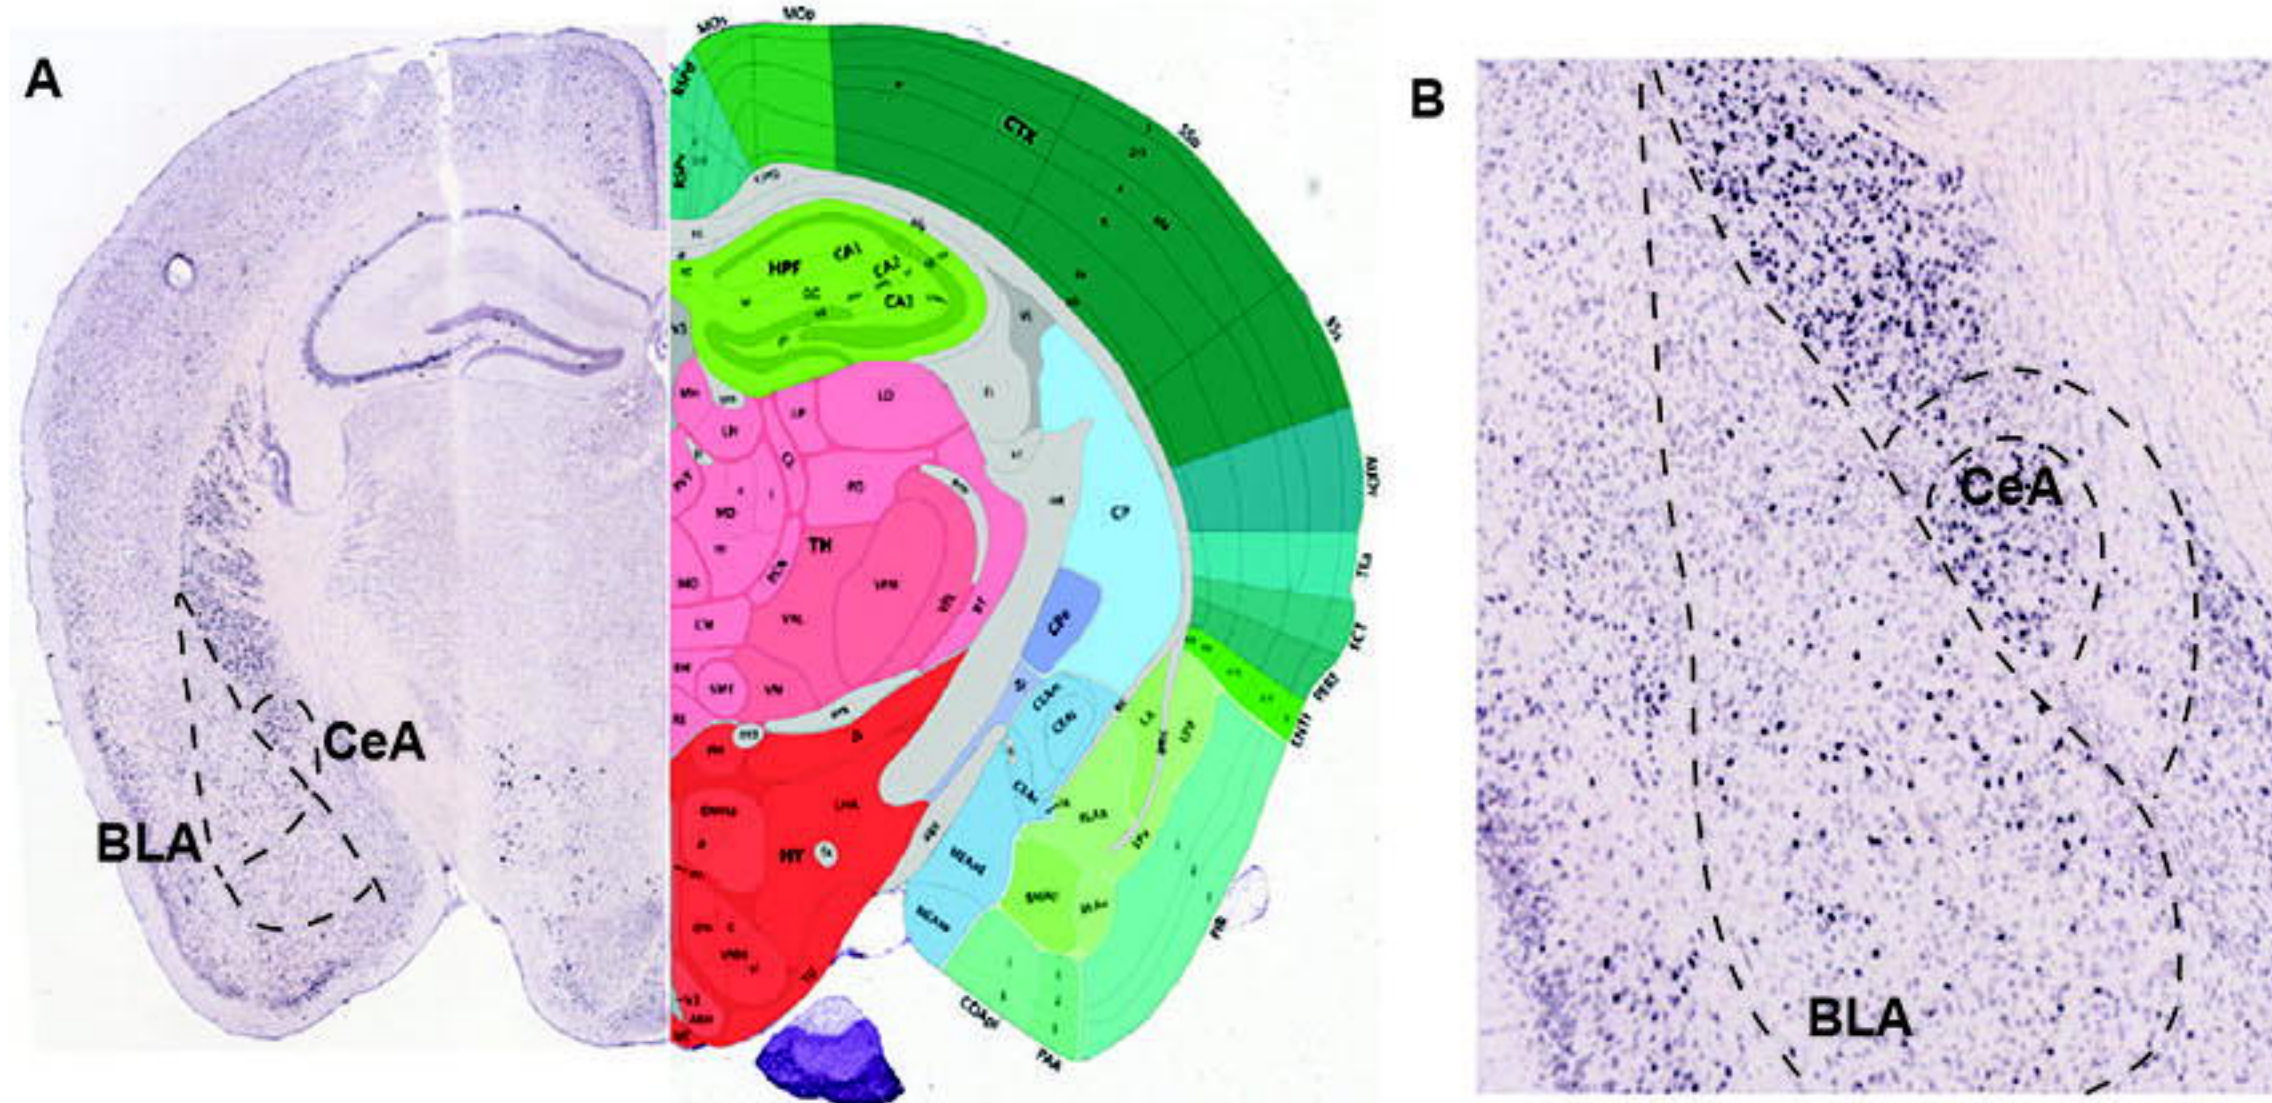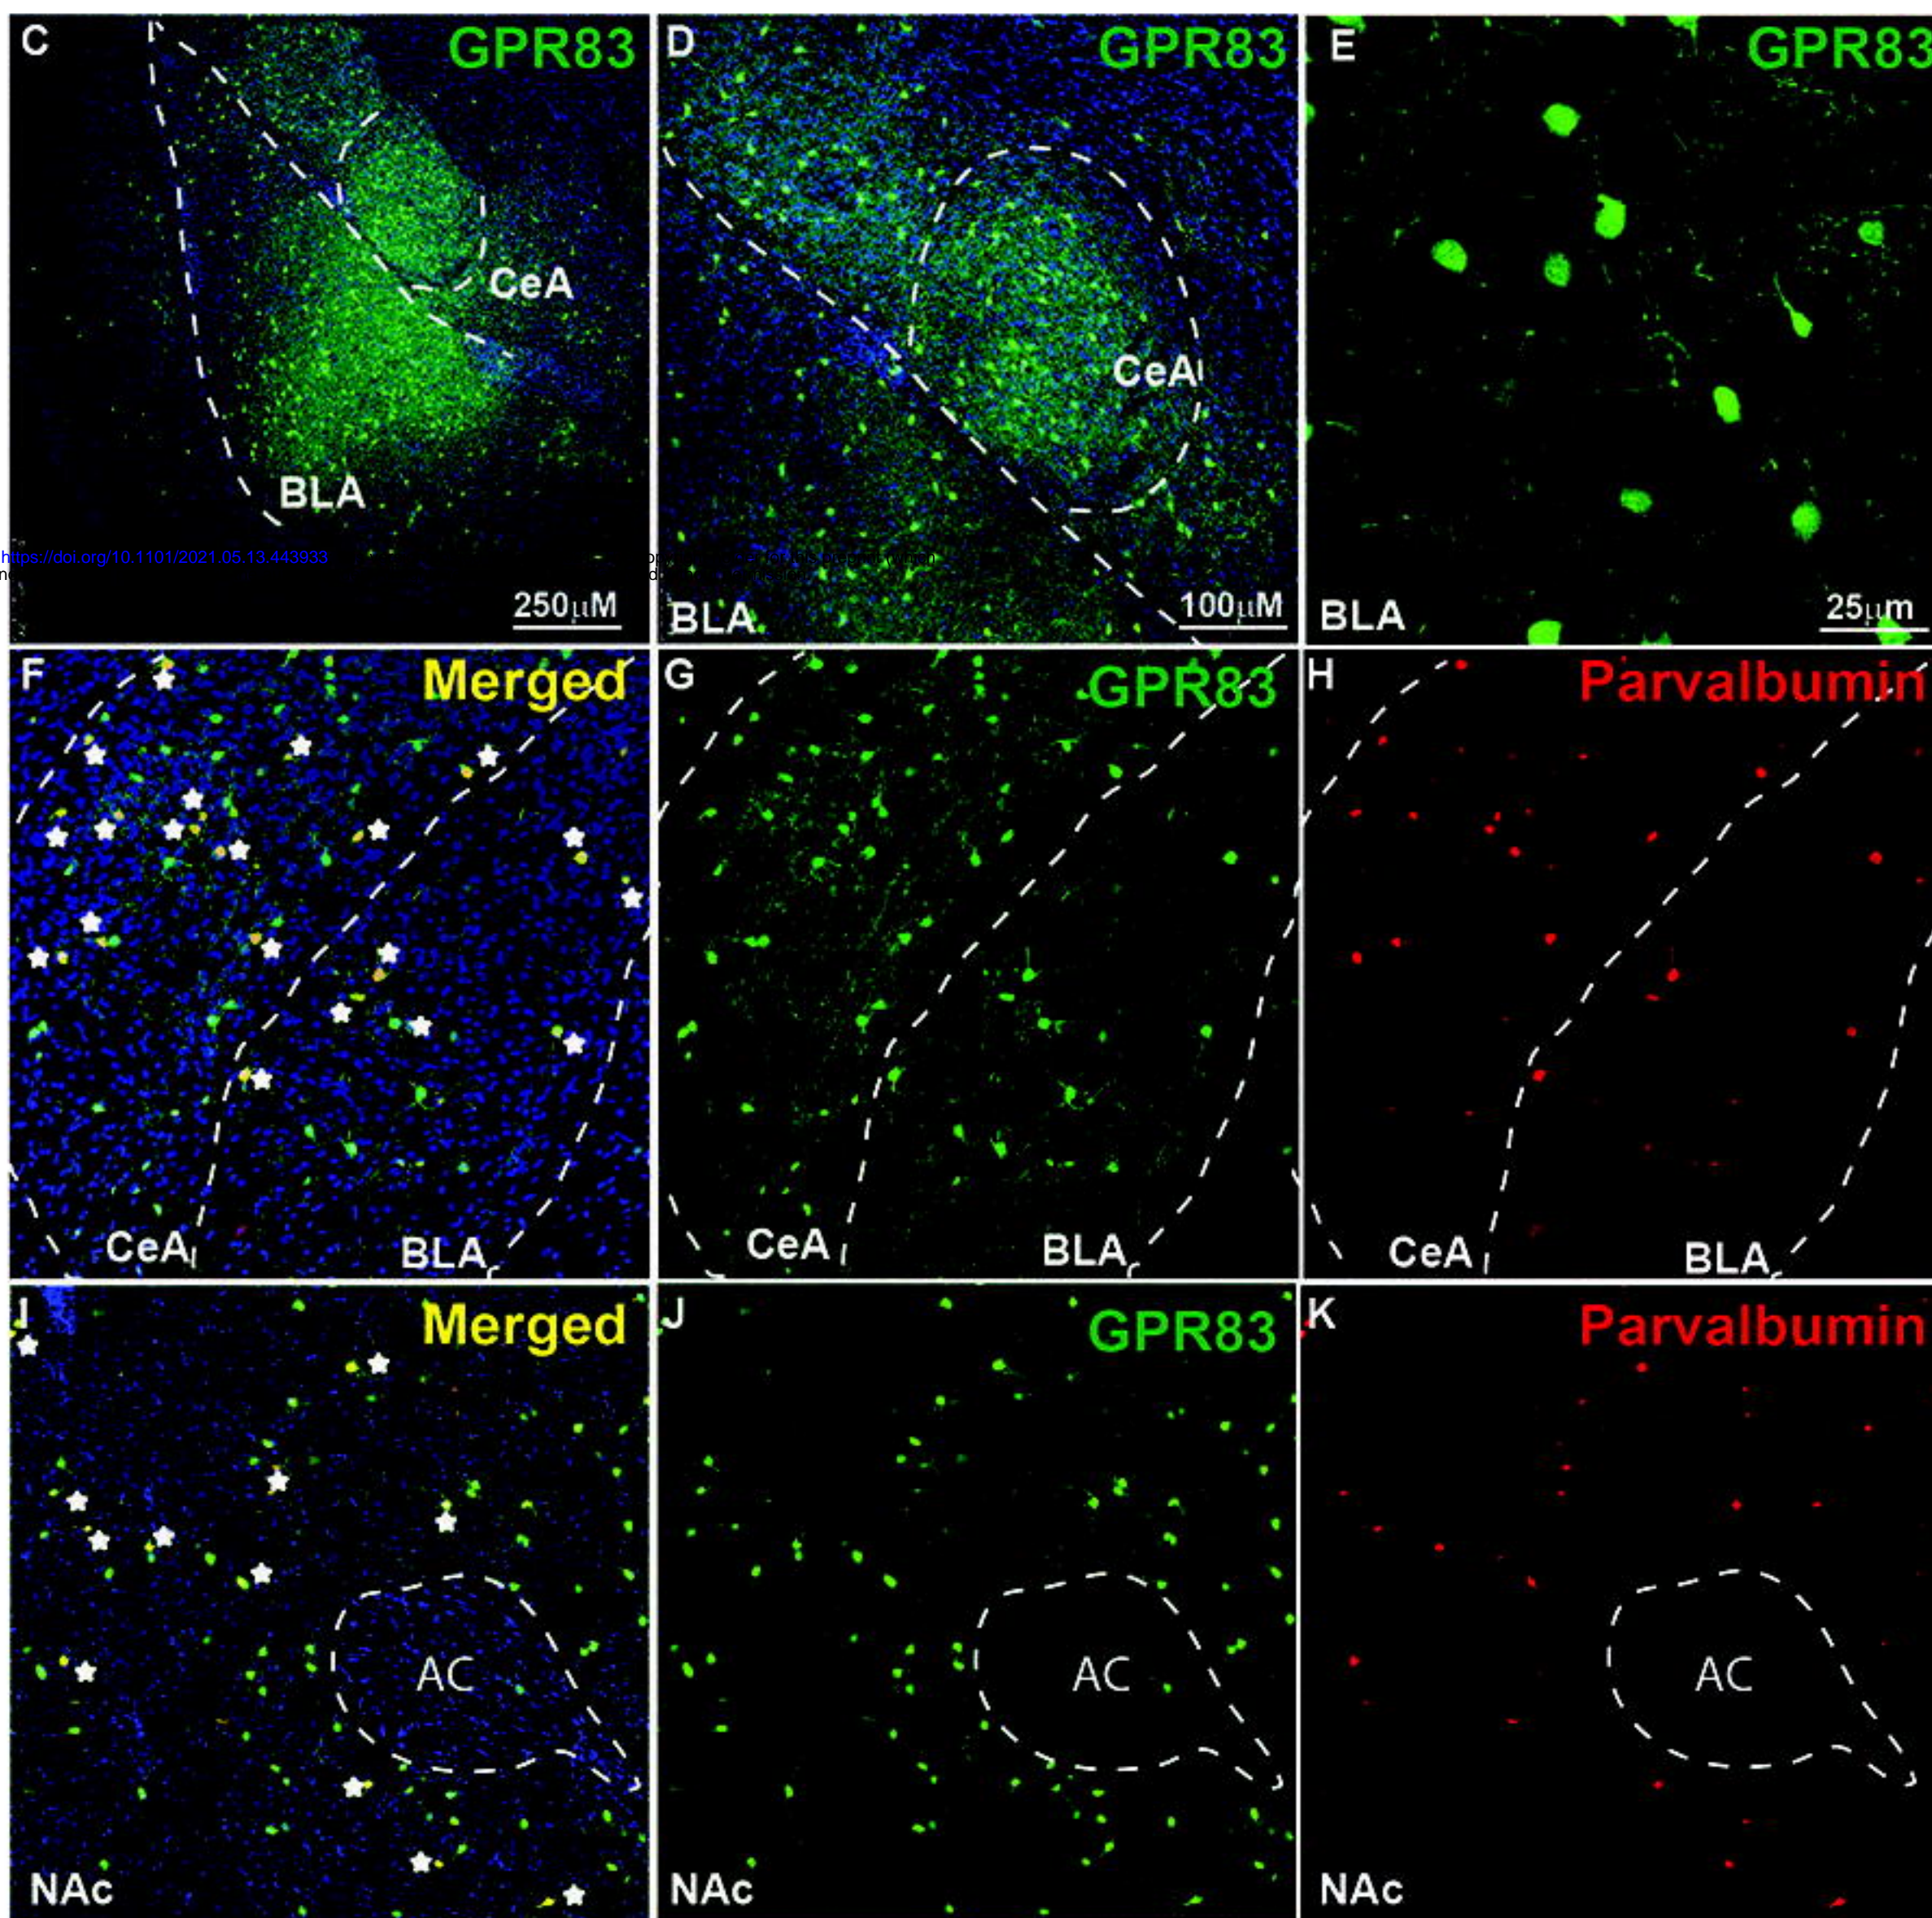

bioRxiv preprint doi: <https://doi.org/10.1101/2021.05.13.443933>; this version posted May 13, 2021. The copyright holder for this preprint (which was not certified by peer review) is the author/funder, who has granted bioRxiv a license to display the preprint in perpetuity. It is made available under aCC-BY 4.0 International license.

Figure 3



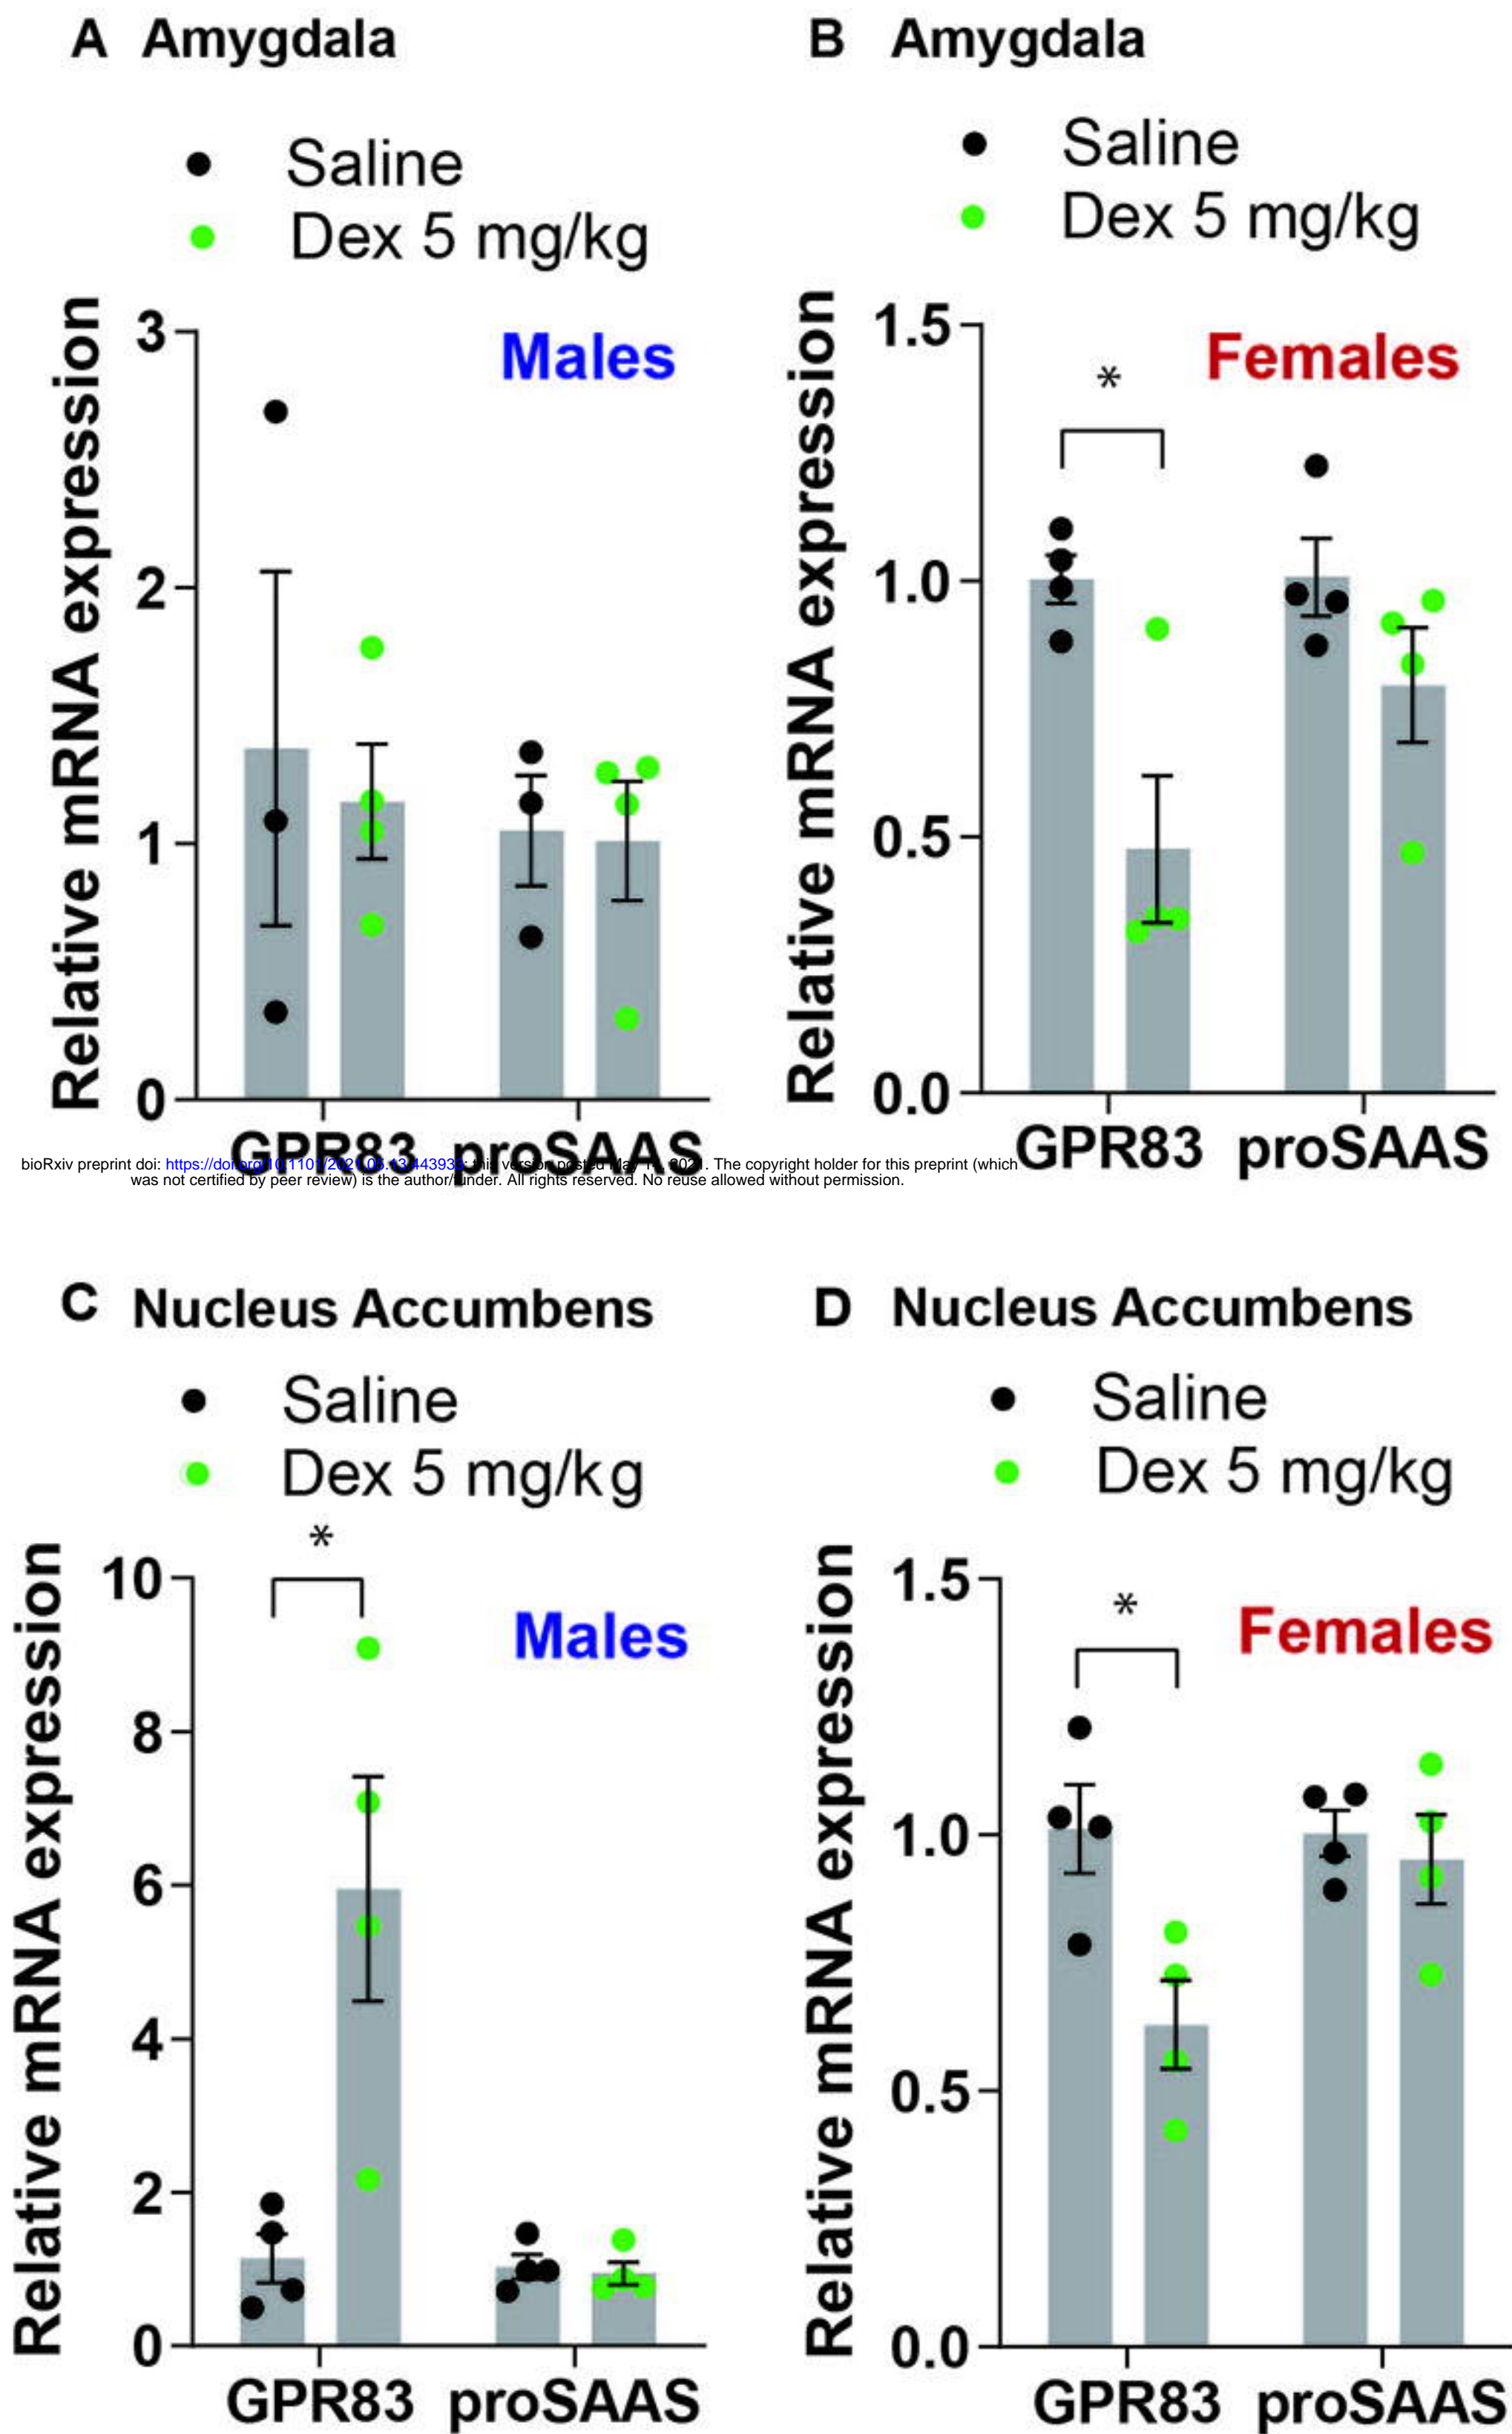

Figure 4



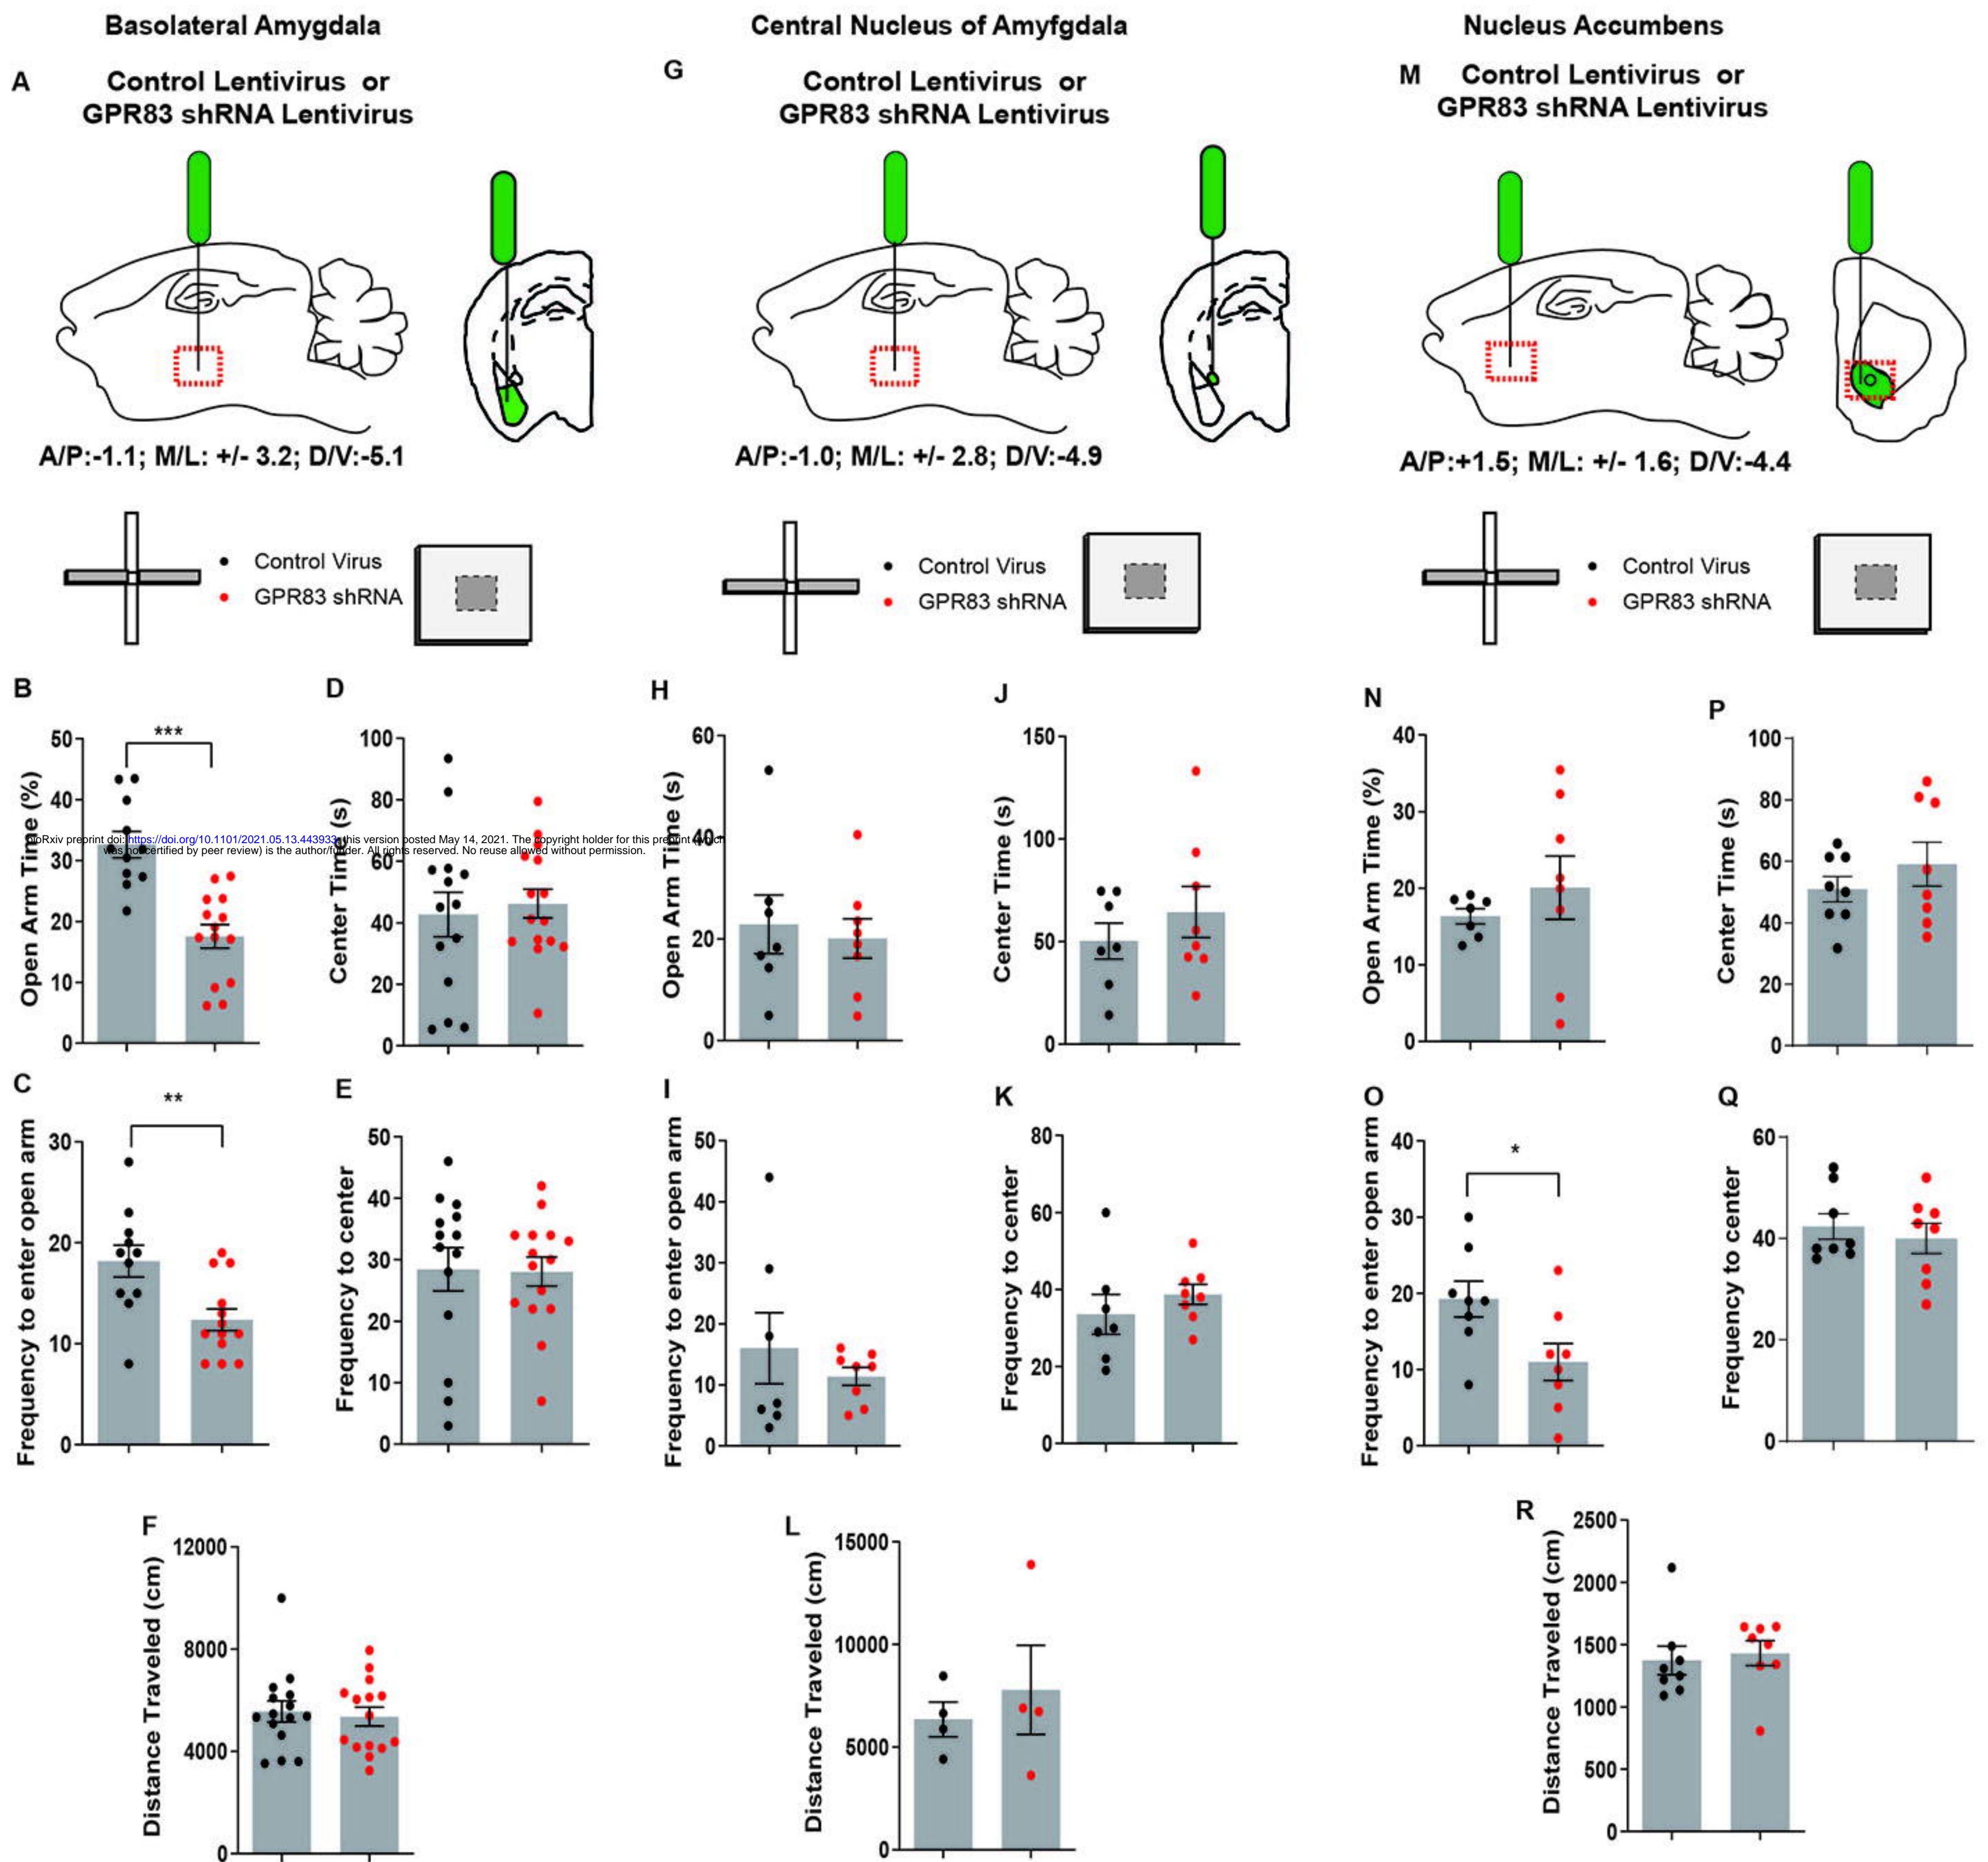

Figure 5



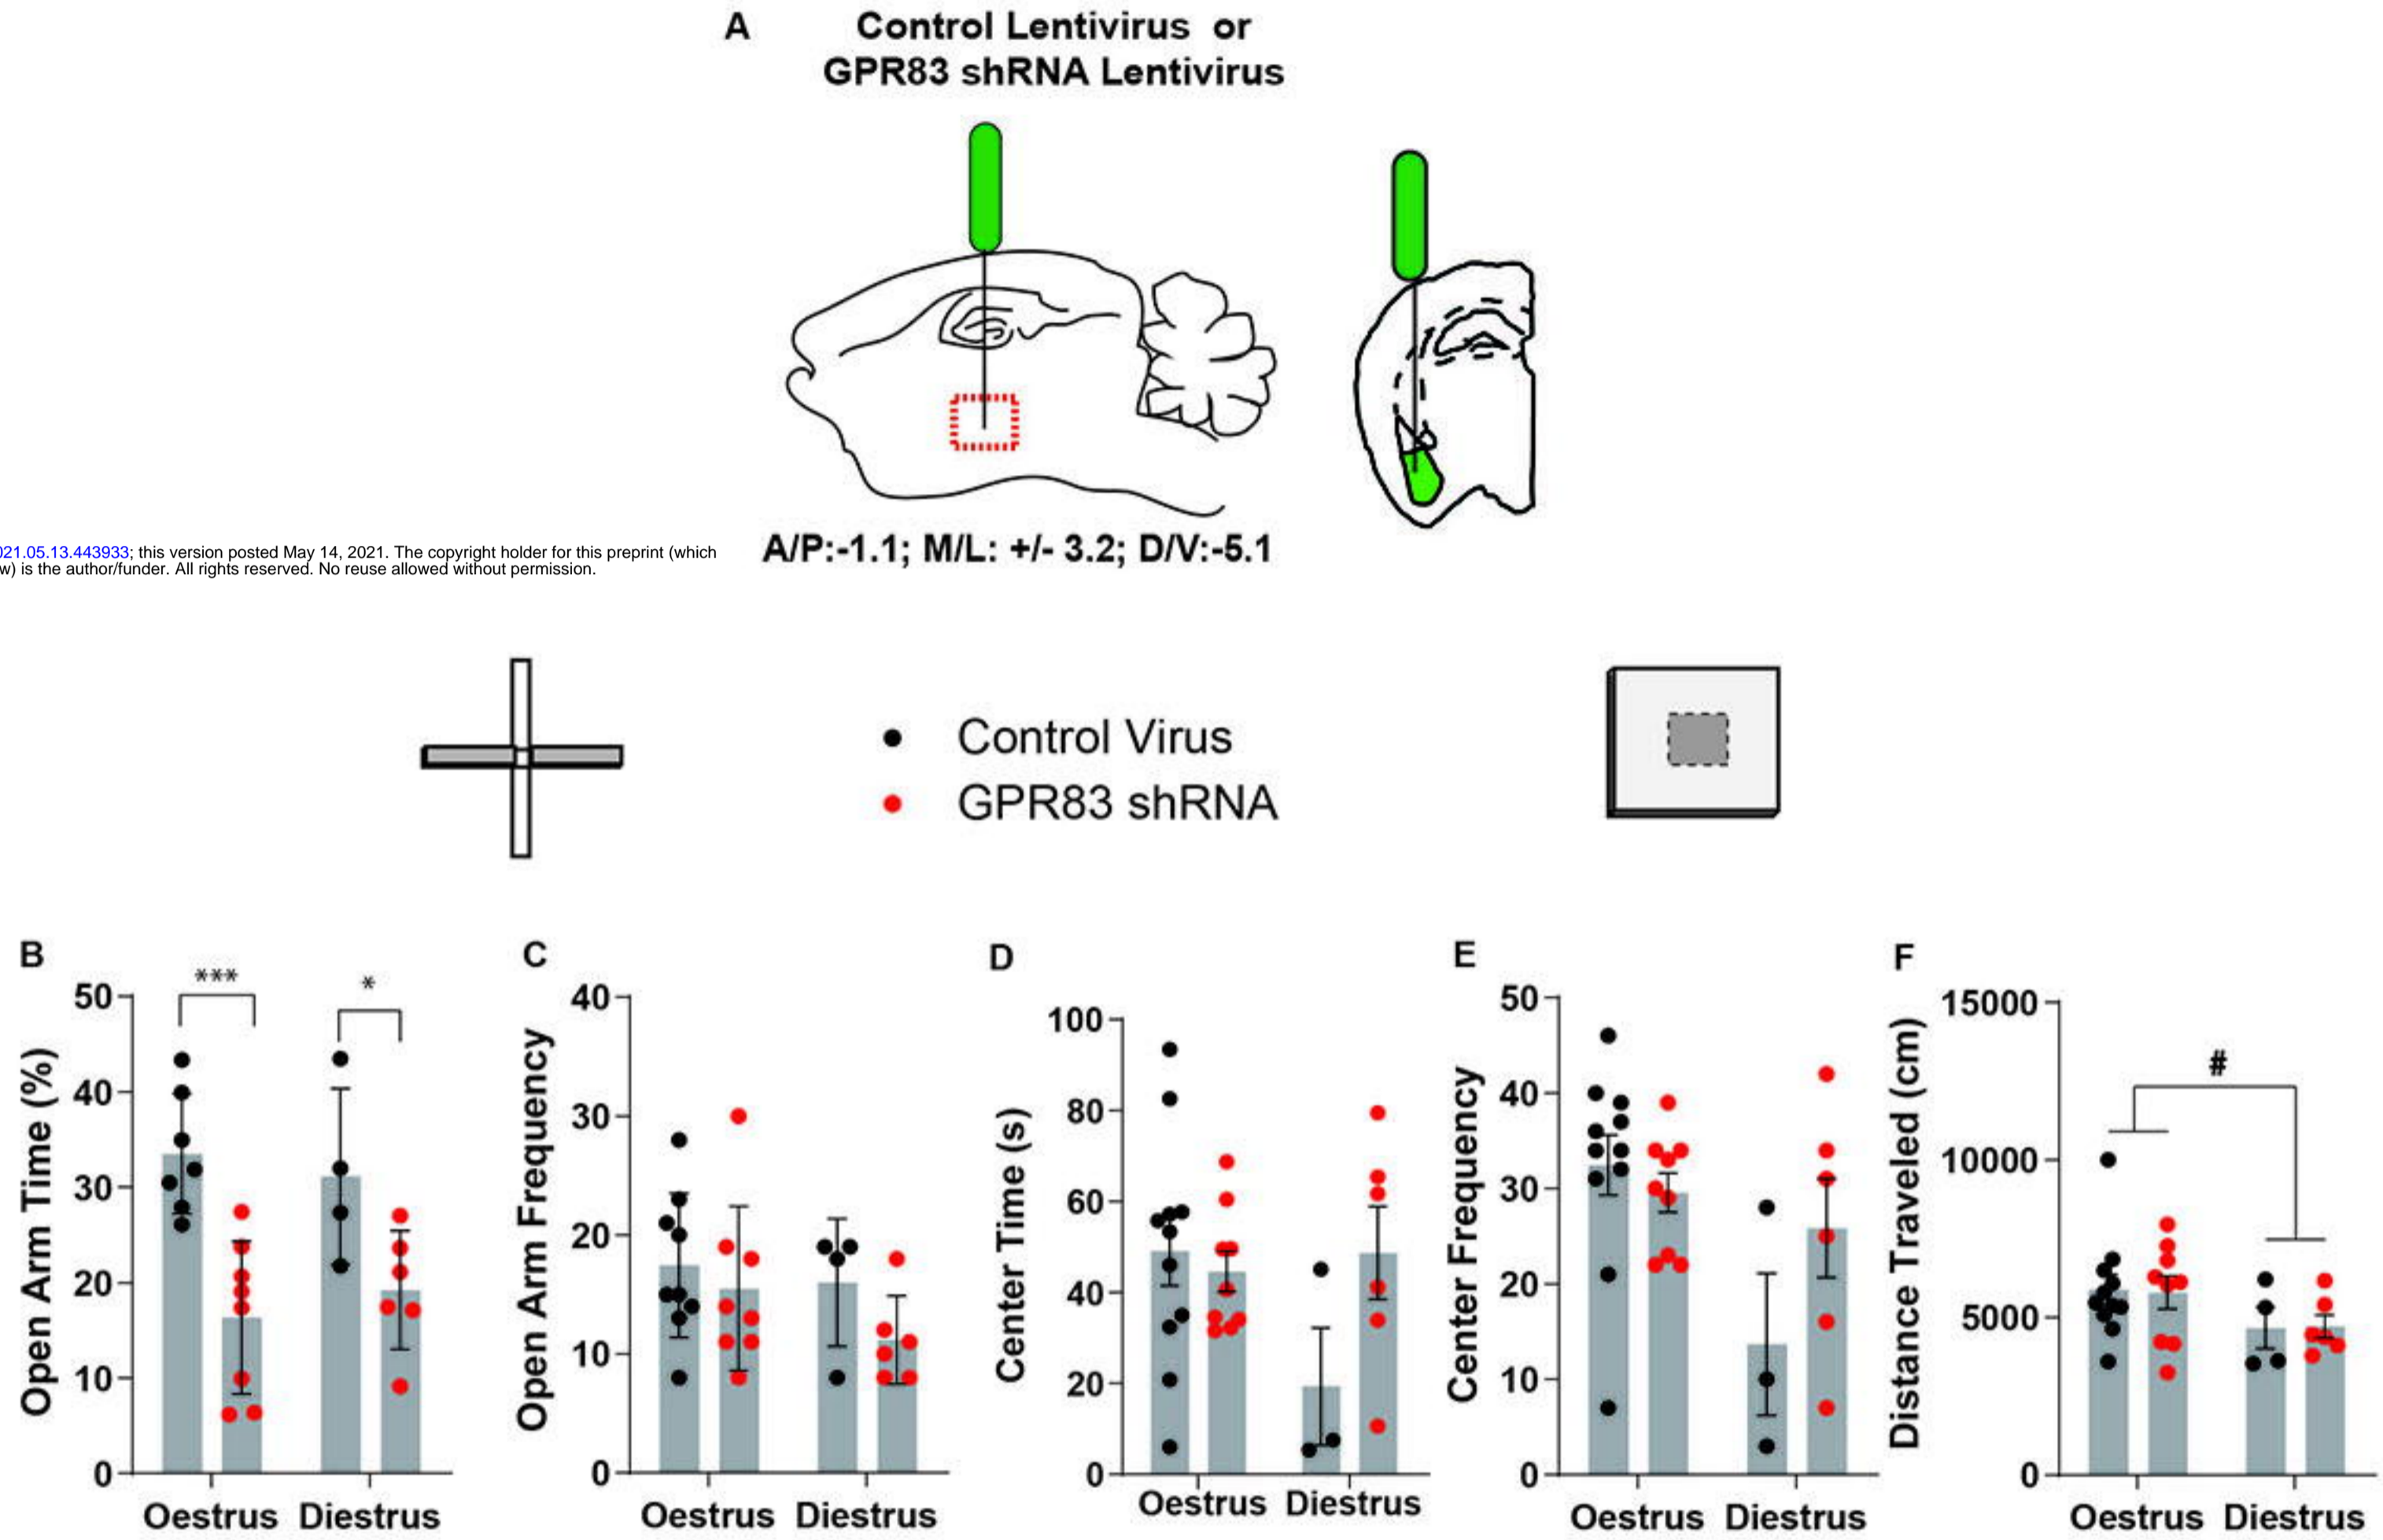

Figure 6
